# Supplementary material for: Historic methicillin-resistant Staphylococcus aureus: expanding current knowledge using molecular epidemiological characterization of a Swiss legacy collection
Source: Springer Nature journal article supplement (doi:10.1186/s13073-024-01292-w), 2024-02-05
Supplement: MOESM1 [file 13073_2024_1292_MOESM1_ESM.pdf]

A. Table of MLST sequence type distribution in different datasets

| ST   | Total frequency (n=1761) | Frequency in CCOS (n=451) | Frequency in Public Repositories (n=103) | Frequency in University Hospital Basel (n=1207) |
|------|--------------------------|---------------------------|------------------------------------------|-------------------------------------------------|
| 247  | 408 (23.2%)              | 376 (83.4%)               | 29 (28.2%)                               | 3 (0.2%)                                        |
| 22   | 214 (12.2%)              |                           | 11 (10.7%)                               | 203 (16.8%)                                     |
| 5    | 153 (8.7%)               | 1 (0.2%)                  | 7 (6.8%)                                 | 145 (12%)                                       |
| 8    | 145 (8.2%)               |                           | 4 (3.9%)                                 | 141 (11.7%)                                     |
| 398  | 93 (5.3%)                |                           |                                          | 93 (7.7%)                                       |
| ?    | 73 (4.1%)                | 1 (0.2%)                  |                                          | 72 (6%)                                         |
| 1    | 73 (4.1%)                |                           |                                          | 73 (6%)                                         |
| 6    | 72 (4.1%)                |                           |                                          | 72 (6%)                                         |
| 30   | 56 (3.2%)                |                           |                                          | 56 (4.6%)                                       |
| 45   | 51 (2.9%)                |                           |                                          | 51 (4.2%)                                       |
| 225  | 41 (2.3%)                |                           |                                          | 41 (3.4%)                                       |
| 239  | 39 (2.2%)                | 15 (3.3%)                 | 15 (14.6%)                               | 9 (0.7%)                                        |
| 250  | 37 (2.1%)                | 7 (1.6%)                  | 30 (29.1%)                               |                                                 |
| 7844 | 25 (1.4%)                | 25 (5.5%)                 |                                          |                                                 |
| 2626 | 23 (1.3%)                |                           |                                          | 23 (1.9%)                                       |
| 1472 | 20 (1.1%)                |                           |                                          | 20 (1.7%)                                       |
| 254  | 18 (1%)                  | 18 (4%)                   |                                          |                                                 |
| 72   | 18 (1%)                  |                           |                                          | 18 (1.5%)                                       |
| 80   | 18 (1%)                  |                           |                                          | 18 (1.5%)                                       |
| 88   | 14 (0.8%)                |                           |                                          | 14 (1.2%)                                       |
| 1232 | 13 (0.7%)                |                           |                                          | 13 (1.1%)                                       |
| 59   | 13 (0.7%)                |                           |                                          | 13 (1.1%)                                       |
| 97   | 12 (0.7%)                |                           |                                          | 12 (1%)                                         |
| 152  | 10 (0.6%)                |                           |                                          | 10 (0.8%)                                       |
| 4080 | 7 (0.4%)                 |                           |                                          | 7 (0.6%)                                        |
| 105  | 6 (0.3%)                 |                           |                                          | 6 (0.5%)                                        |
| 672  | 6 (0.3%)                 |                           |                                          | 6 (0.5%)                                        |
| 1529 | 5 (0.3%)                 |                           | 5 (4.9%)                                 |                                                 |
| 1637 | 5 (0.3%)                 |                           |                                          | 5 (0.4%)                                        |
| 94   | 5 (0.3%)                 |                           |                                          | 5 (0.4%)                                        |
| 130  | 4 (0.2%)                 |                           |                                          | 4 (0.3%)                                        |
| 149  | 4 (0.2%)                 |                           |                                          | 4 (0.3%)                                        |
| 188  | 4 (0.2%)                 |                           |                                          | 4 (0.3%)                                        |
| 49   | 4 (0.2%)                 |                           |                                          | 4 (0.3%)                                        |
| 125  | 3 (0.2%)                 |                           |                                          | 3 (0.2%)                                        |
| 1413 | 3 (0.2%)                 |                           |                                          | 3 (0.2%)                                        |
| 2802 | 3 (0.2%)                 |                           |                                          | 3 (0.2%)                                        |
| 368  | 3 (0.2%)                 |                           |                                          | 3 (0.2%)                                        |
| 737  | 3 (0.2%)                 |                           |                                          | 3 (0.2%)                                        |
| 772  | 3 (0.2%)                 |                           |                                          | 3 (0.2%)                                        |
| 834  | 3 (0.2%)                 |                           |                                          | 3 (0.2%)                                        |
| 113  | 2 (0.1%)                 |                           |                                          | 2 (0.2%)                                        |
| 121  | 2 (0.1%)                 |                           |                                          | 2 (0.2%)                                        |
| 241  | 2 (0.1%)                 |                           |                                          | 2 (0.2%)                                        |
| 4994 | 2 (0.1%)                 |                           |                                          | 2 (0.2%)                                        |
| 7    | 2 (0.1%)                 |                           |                                          | 2 (0.2%)                                        |
| 7119 | 2 (0.1%)                 |                           |                                          | 2 (0.2%)                                        |
| 7638 | 2 (0.1%)                 | 2 (0.4%)                  |                                          |                                                 |
| 7839 | 2 (0.1%)                 | 2 (0.4%)                  |                                          |                                                 |
| 789  | 2 (0.1%)                 |                           |                                          | 2 (0.2%)                                        |
| 923  | 2 (0.1%)                 |                           |                                          | 2 (0.2%)                                        |
| 111  | 1 (0.1%)                 |                           |                                          | 1 (0.1%)                                        |
| 1153 | 1 (0.1%)                 |                           |                                          | 1 (0.1%)                                        |
| 1245 | 1 (0.1%)                 |                           |                                          | 1 (0.1%)                                        |
| 1327 | 1 (0.1%)                 |                           |                                          | 1 (0.1%)                                        |
| 1456 | 1 (0.1%)                 |                           |                                          | 1 (0.1%)                                        |
| 146  | 1 (0.1%)                 |                           |                                          | 1 (0.1%)                                        |
| 1649 | 1 (0.1%)                 |                           |                                          | 1 (0.1%)                                        |
| 207  | 1 (0.1%)                 |                           |                                          | 1 (0.1%)                                        |
| 2249 | 1 (0.1%)                 |                           | 1 (1%)                                   |                                                 |
| 228  | 1 (0.1%)                 |                           |                                          | 1 (0.1%)                                        |
| 2371 | 1 (0.1%)                 |                           |                                          | 1 (0.1%)                                        |
| 2625 | 1 (0.1%)                 |                           |                                          | 1 (0.1%)                                        |
| 3108 | 1 (0.1%)                 |                           |                                          | 1 (0.1%)                                        |
| 3124 | 1 (0.1%)                 |                           |                                          | 1 (0.1%)                                        |
| 337  | 1 (0.1%)                 |                           | 1 (1%)                                   |                                                 |
| 338  | 1 (0.1%)                 |                           |                                          | 1 (0.1%)                                        |
| 36   | 1 (0.1%)                 |                           |                                          | 1 (0.1%)                                        |
| 39   | 1 (0.1%)                 |                           |                                          | 1 (0.1%)                                        |
| 3923 | 1 (0.1%)                 |                           |                                          | 1 (0.1%)                                        |
| 4006 | 1 (0.1%)                 |                           |                                          | 1 (0.1%)                                        |
| 5004 | 1 (0.1%)                 |                           |                                          | 1 (0.1%)                                        |
| 5184 | 1 (0.1%)                 |                           |                                          | 1 (0.1%)                                        |
| 630  | 1 (0.1%)                 |                           |                                          | 1 (0.1%)                                        |
| 6864 | 1 (0.1%)                 |                           |                                          | 1 (0.1%)                                        |
| 718  | 1 (0.1%)                 |                           |                                          | 1 (0.1%)                                        |
| 7837 | 1 (0.1%)                 | 1 (0.2%)                  |                                          |                                                 |
| 7842 | 1 (0.1%)                 | 1 (0.2%)                  |                                          |                                                 |
| 7843 | 1 (0.1%)                 | 1 (0.2%)                  |                                          |                                                 |
| 87   | 1 (0.1%)                 |                           |                                          | 1 (0.1%)                                        |
| 9    | 1 (0.1%)                 | 1 (0.2%)                  |                                          |                                                 |
| 939  | 1 (0.1%)                 |                           |                                          | 1 (0.1%)                                        |

### Countries of collection (n=12)

- Australia
- Belgium
- Denmark
- Finland
- Germany
- Japan
- Poland
- Portugal
- Singapore
- Switzerland
- United Kingdom
- Unites States of America
- unknown

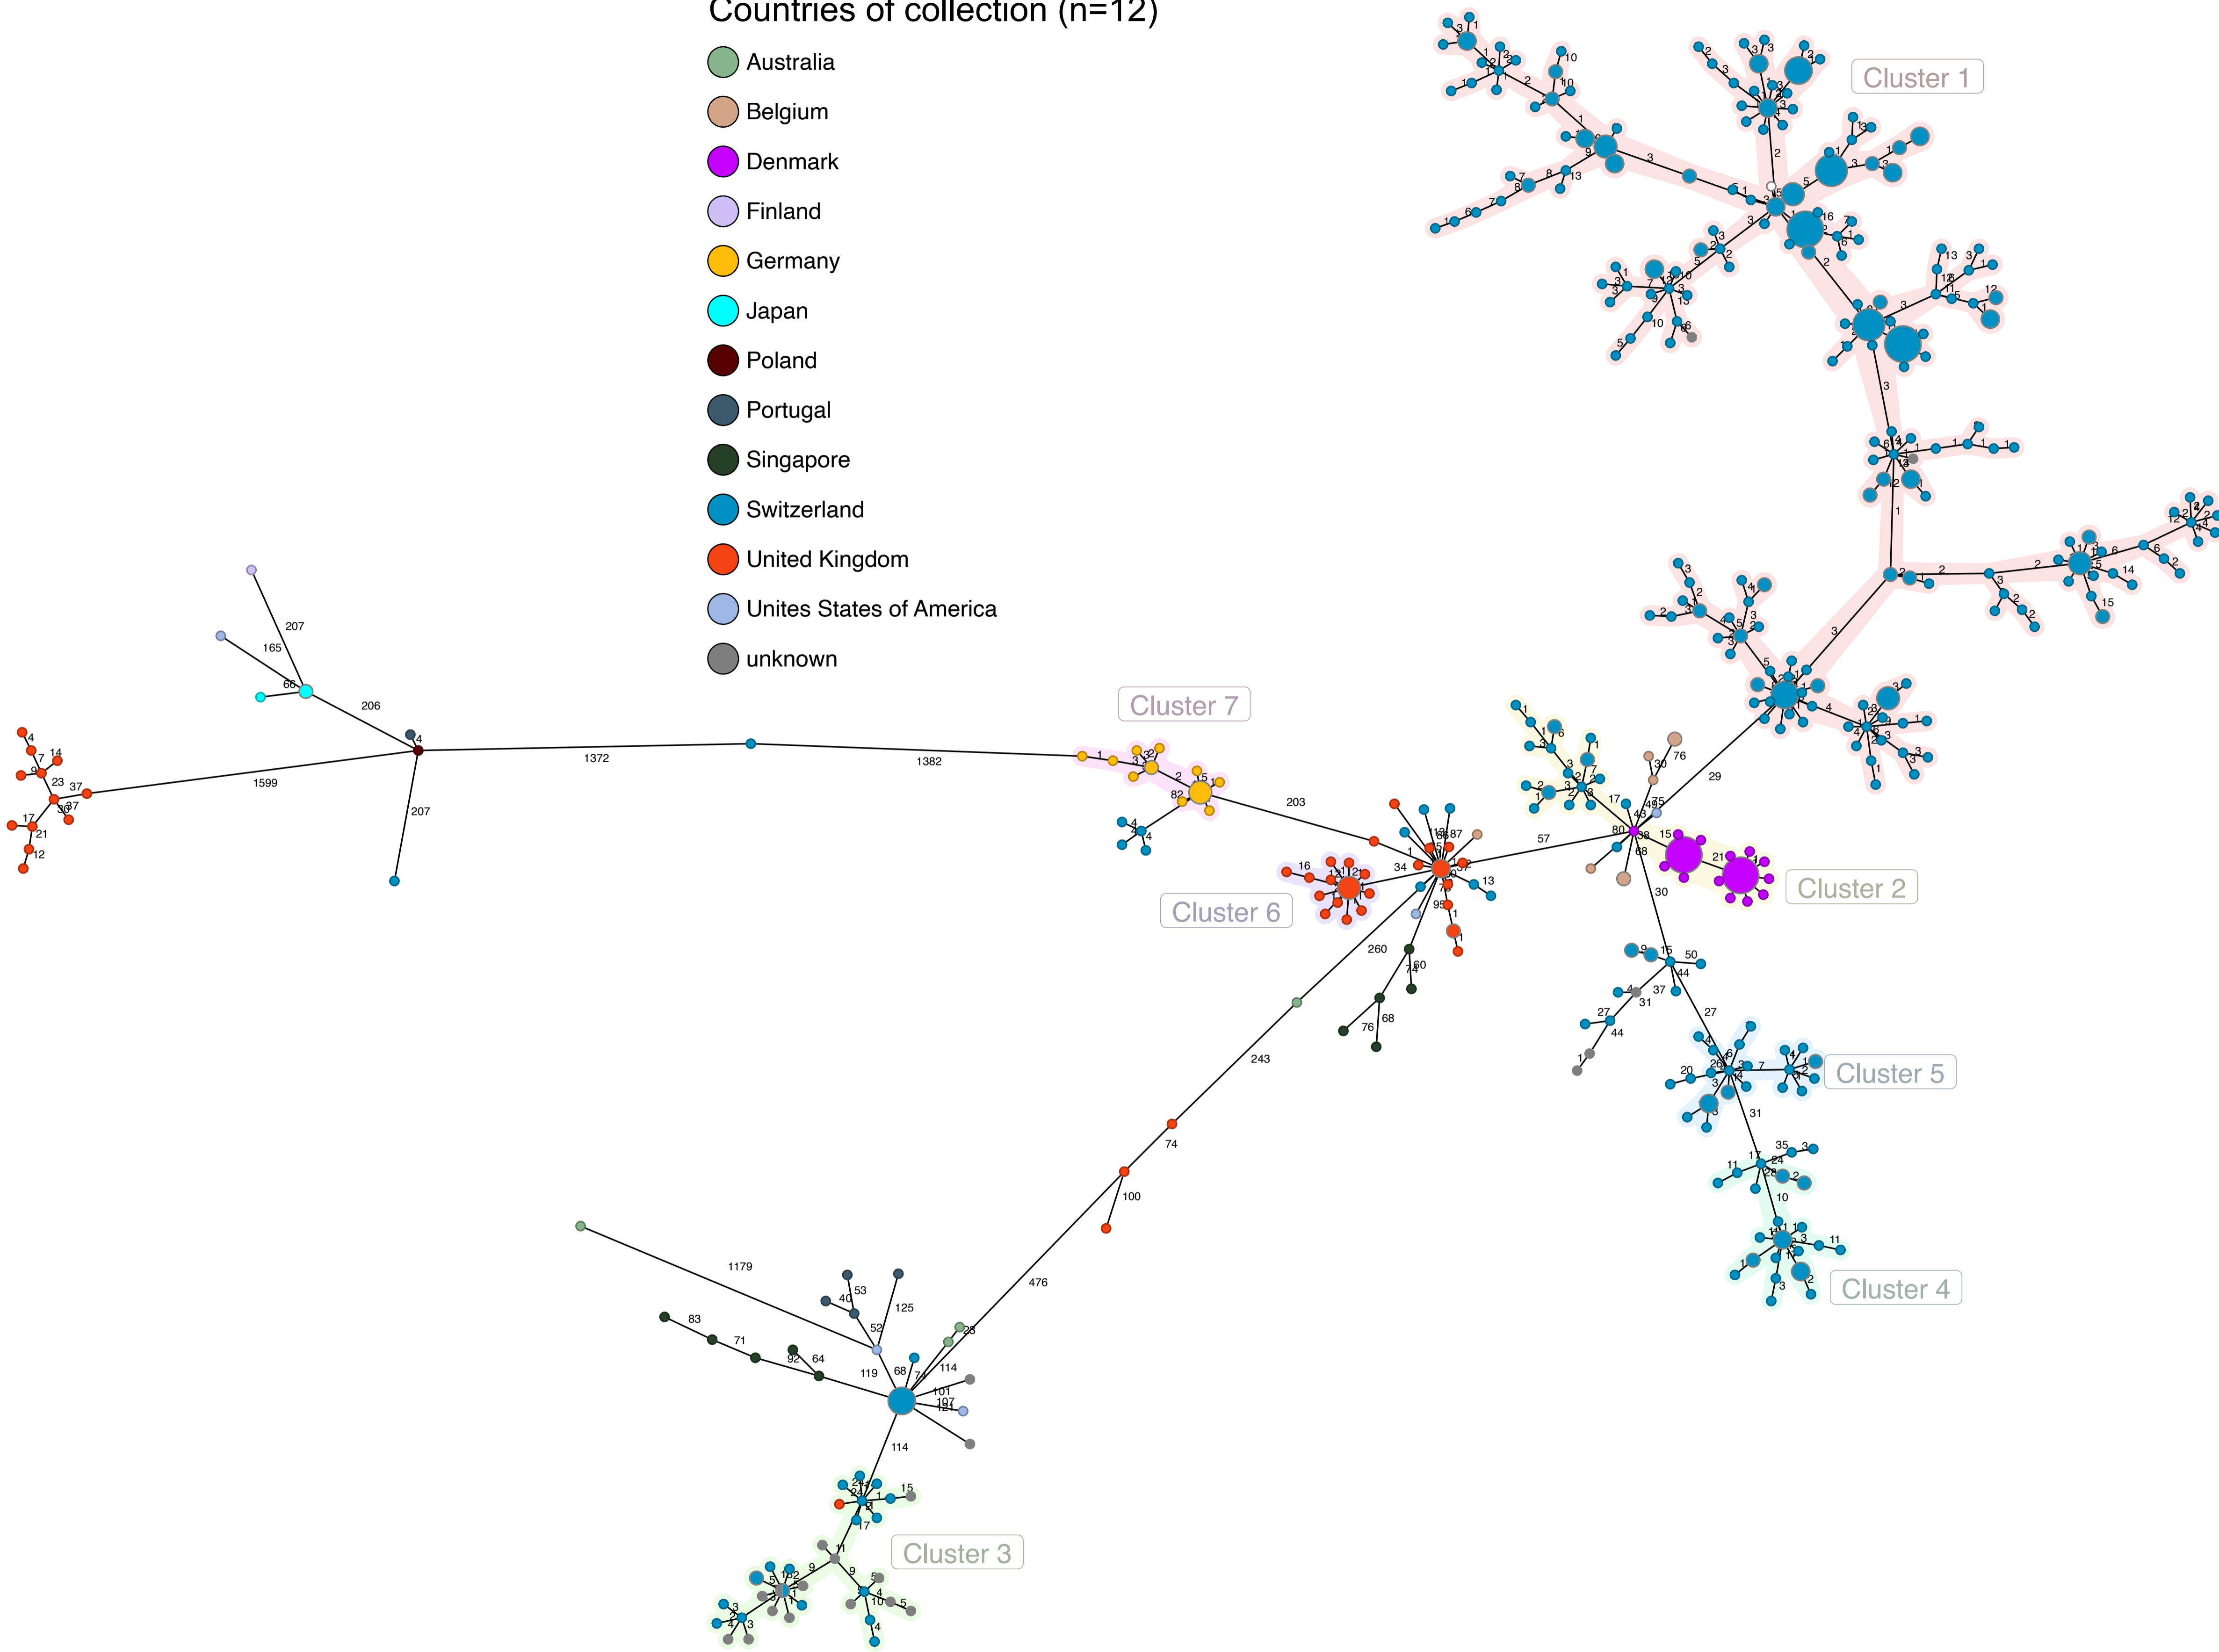

B. cgMLST MST of CCoS and public repository genomes of MRSA (1960-1992, n = 554), nodes colored by collection country. Clusters are shown with a maximal cluster distance of 24 allele differences and a minimal cluster size of 15.

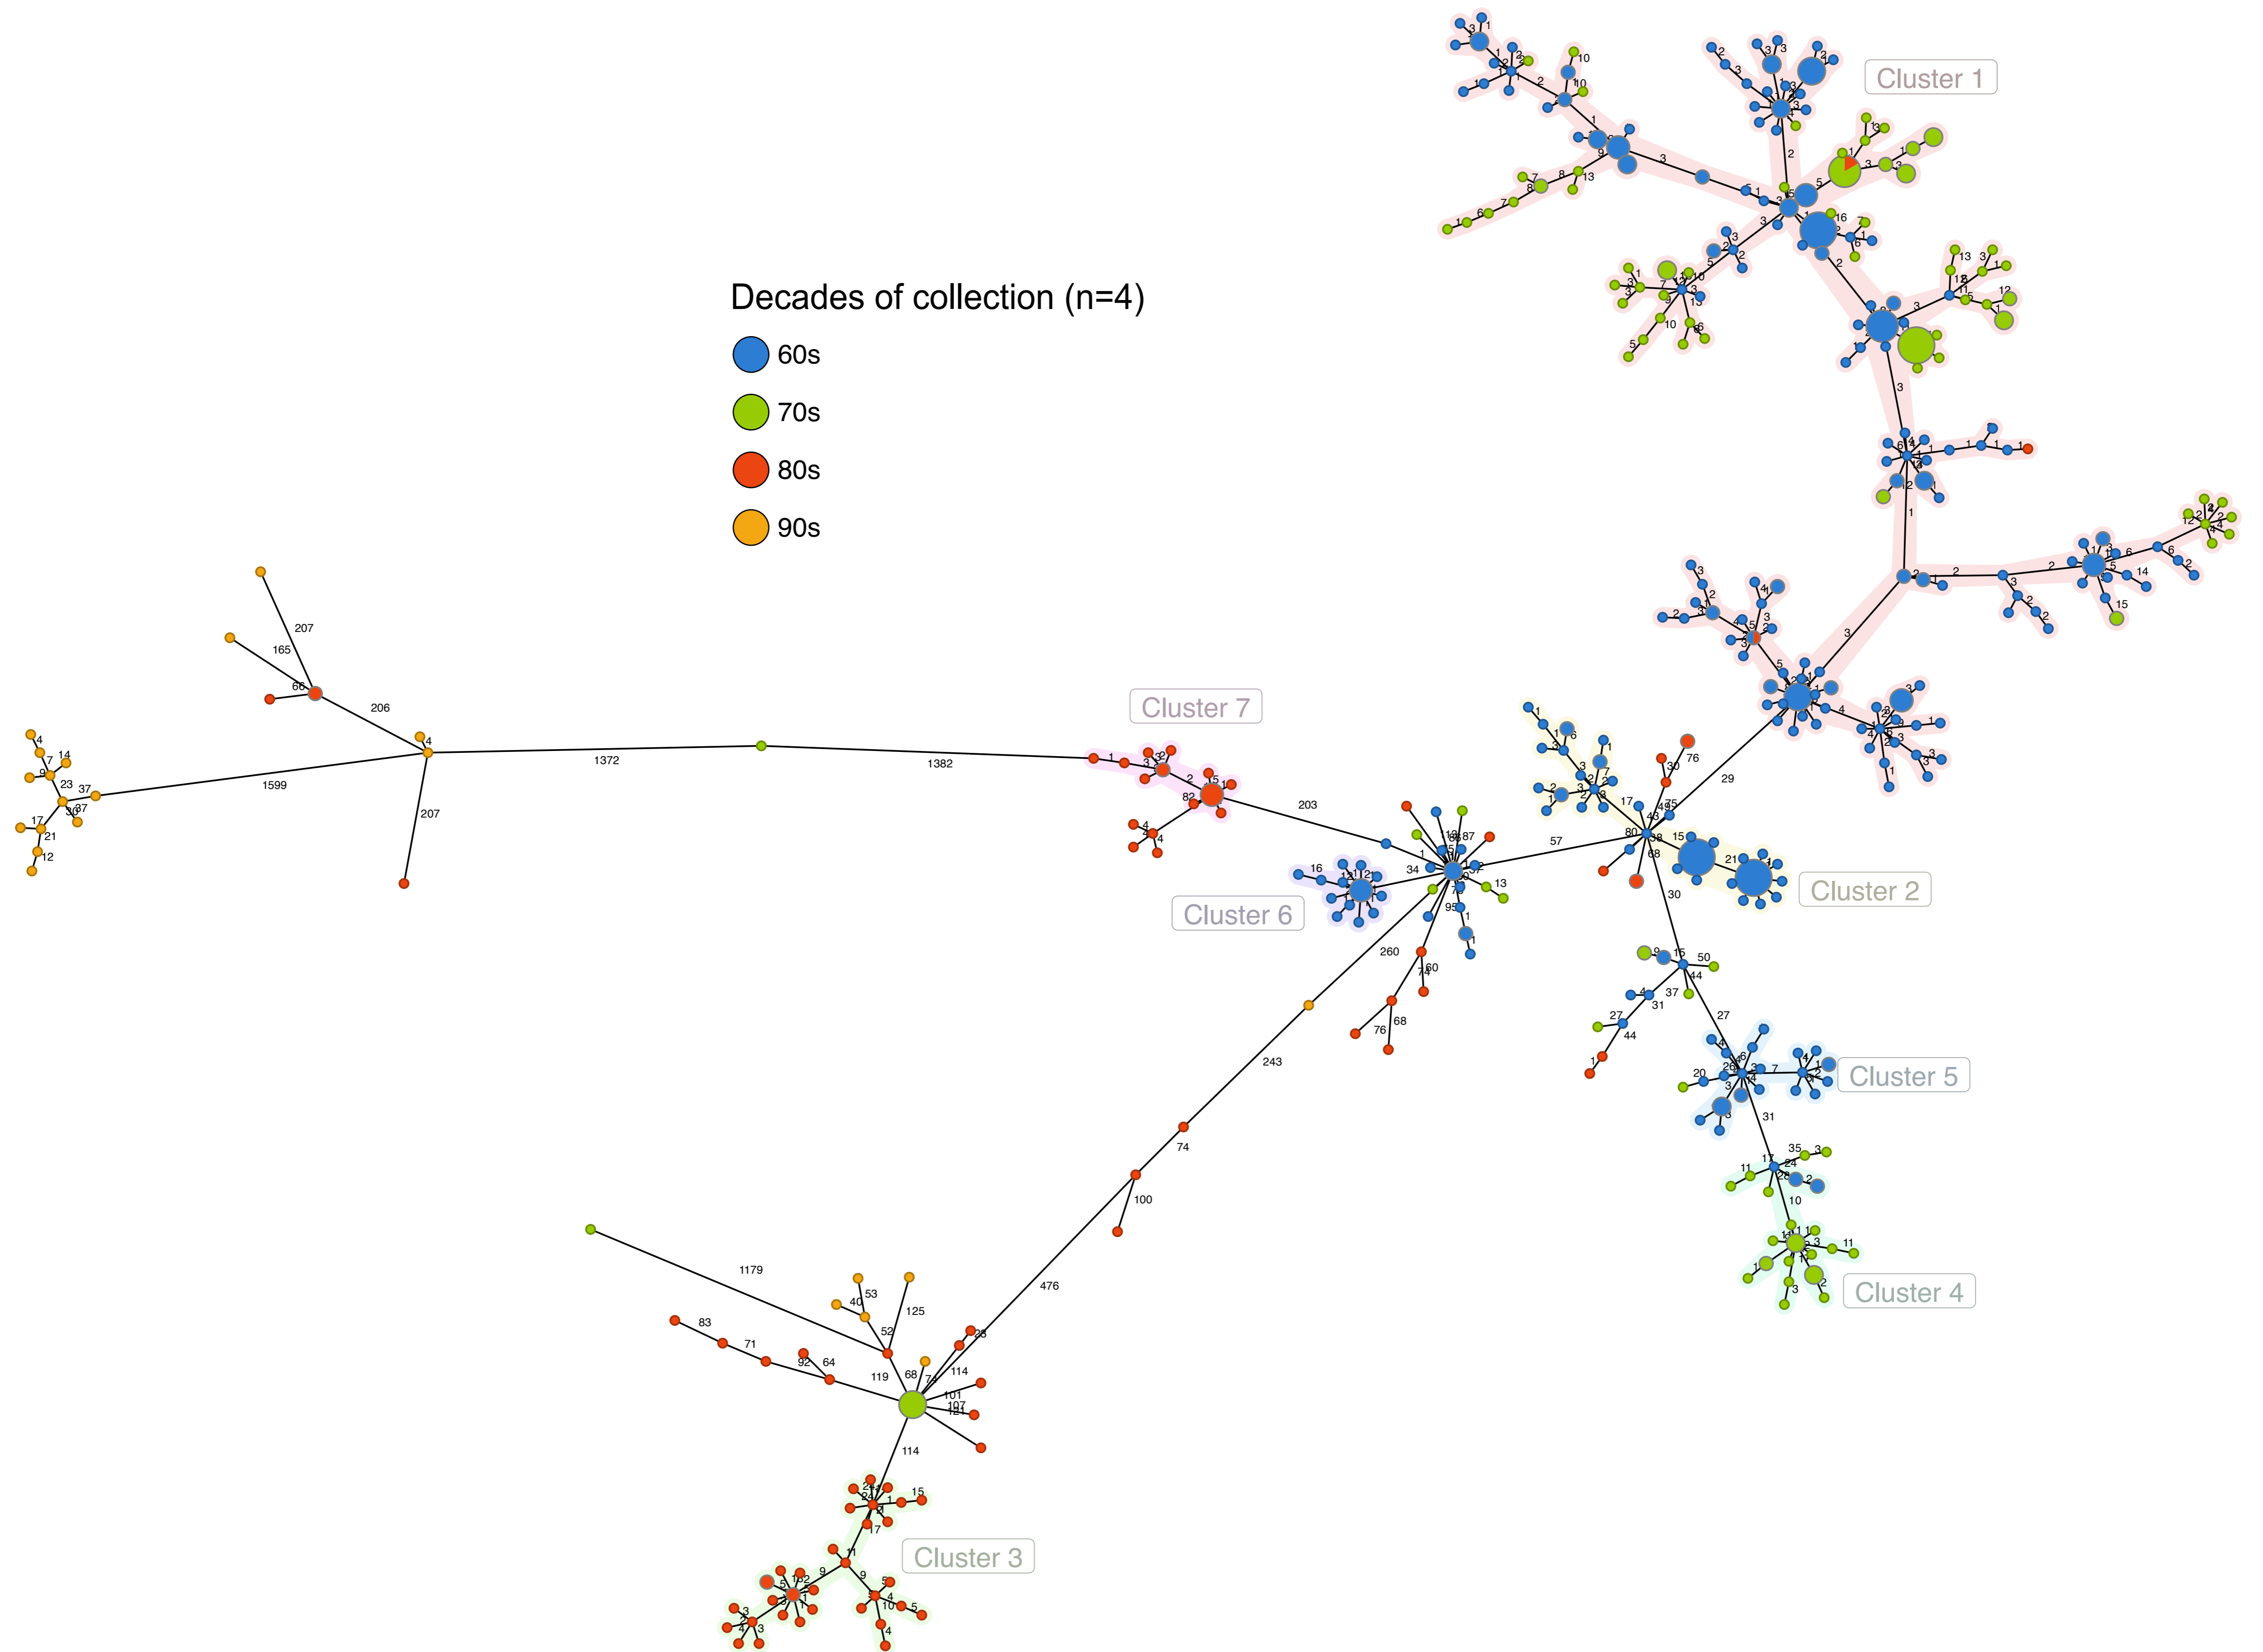

C. cgMLST MST of CCoS and public repository genomes of MRSA (1960-1992, n = 554), nodes colored by sequence type and CCs are shaded. Clusters are shown with a maximal cluster distance of 24 allele differences and a minimal cluster size of 15.

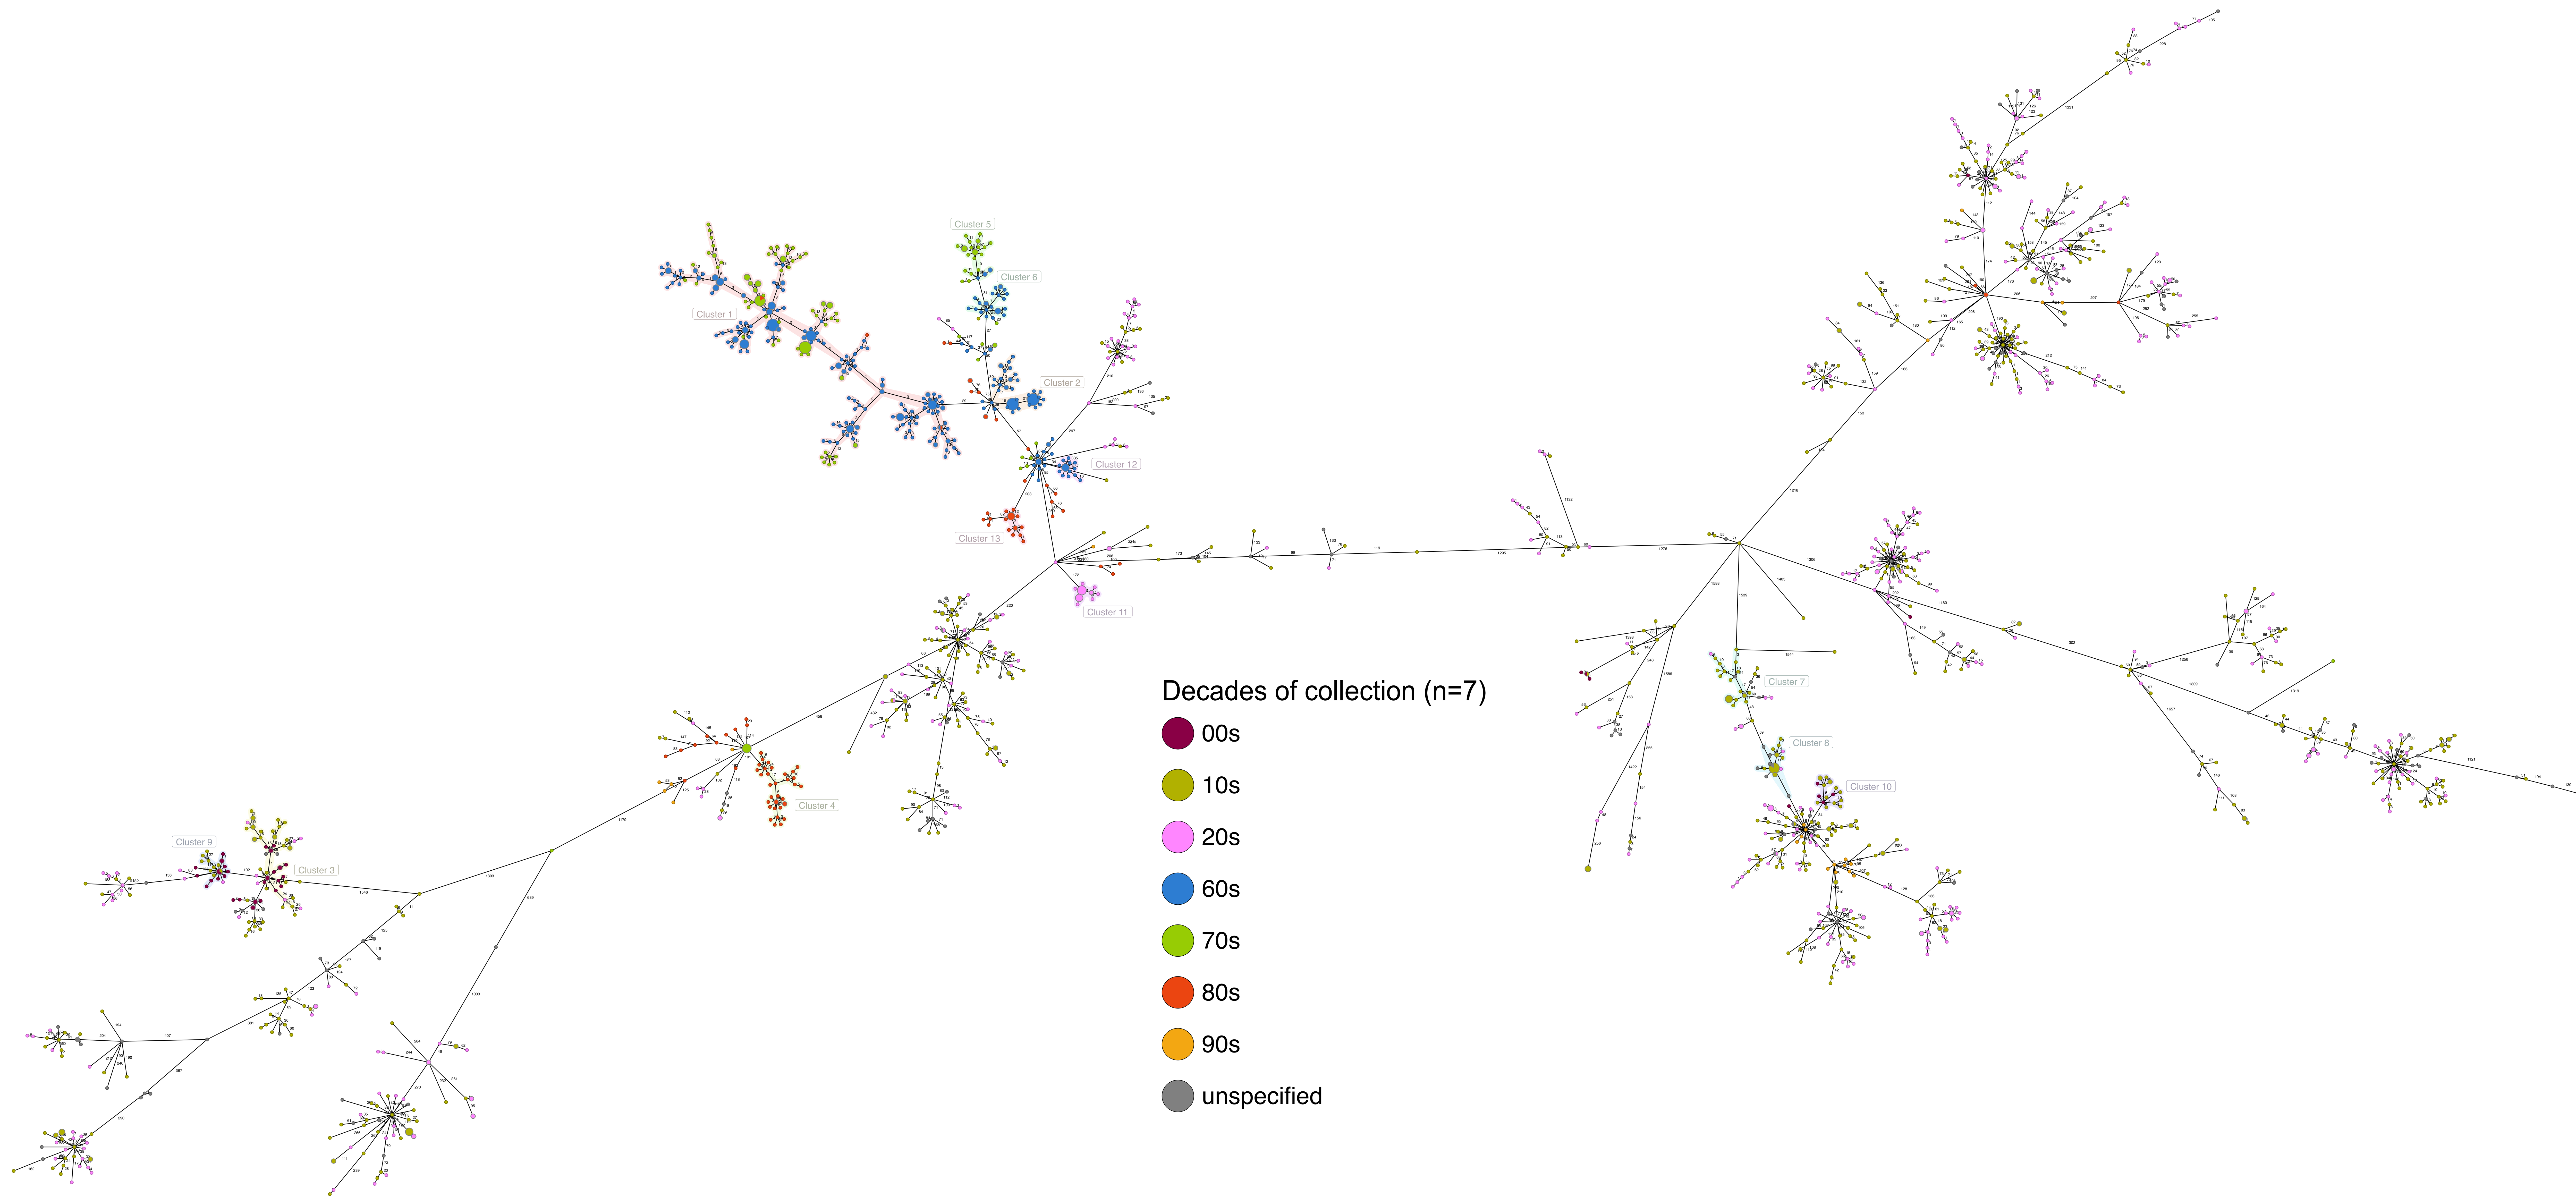

D. cgMLST MST of CCoS, public repository and University Hospital of Basel genomes of MRSA (1960-2022, n = 1761), nodes colored by collection decade. Clusters are shown with a maximal cluster distance of 24 allele differences and a minimal cluster size of 15.

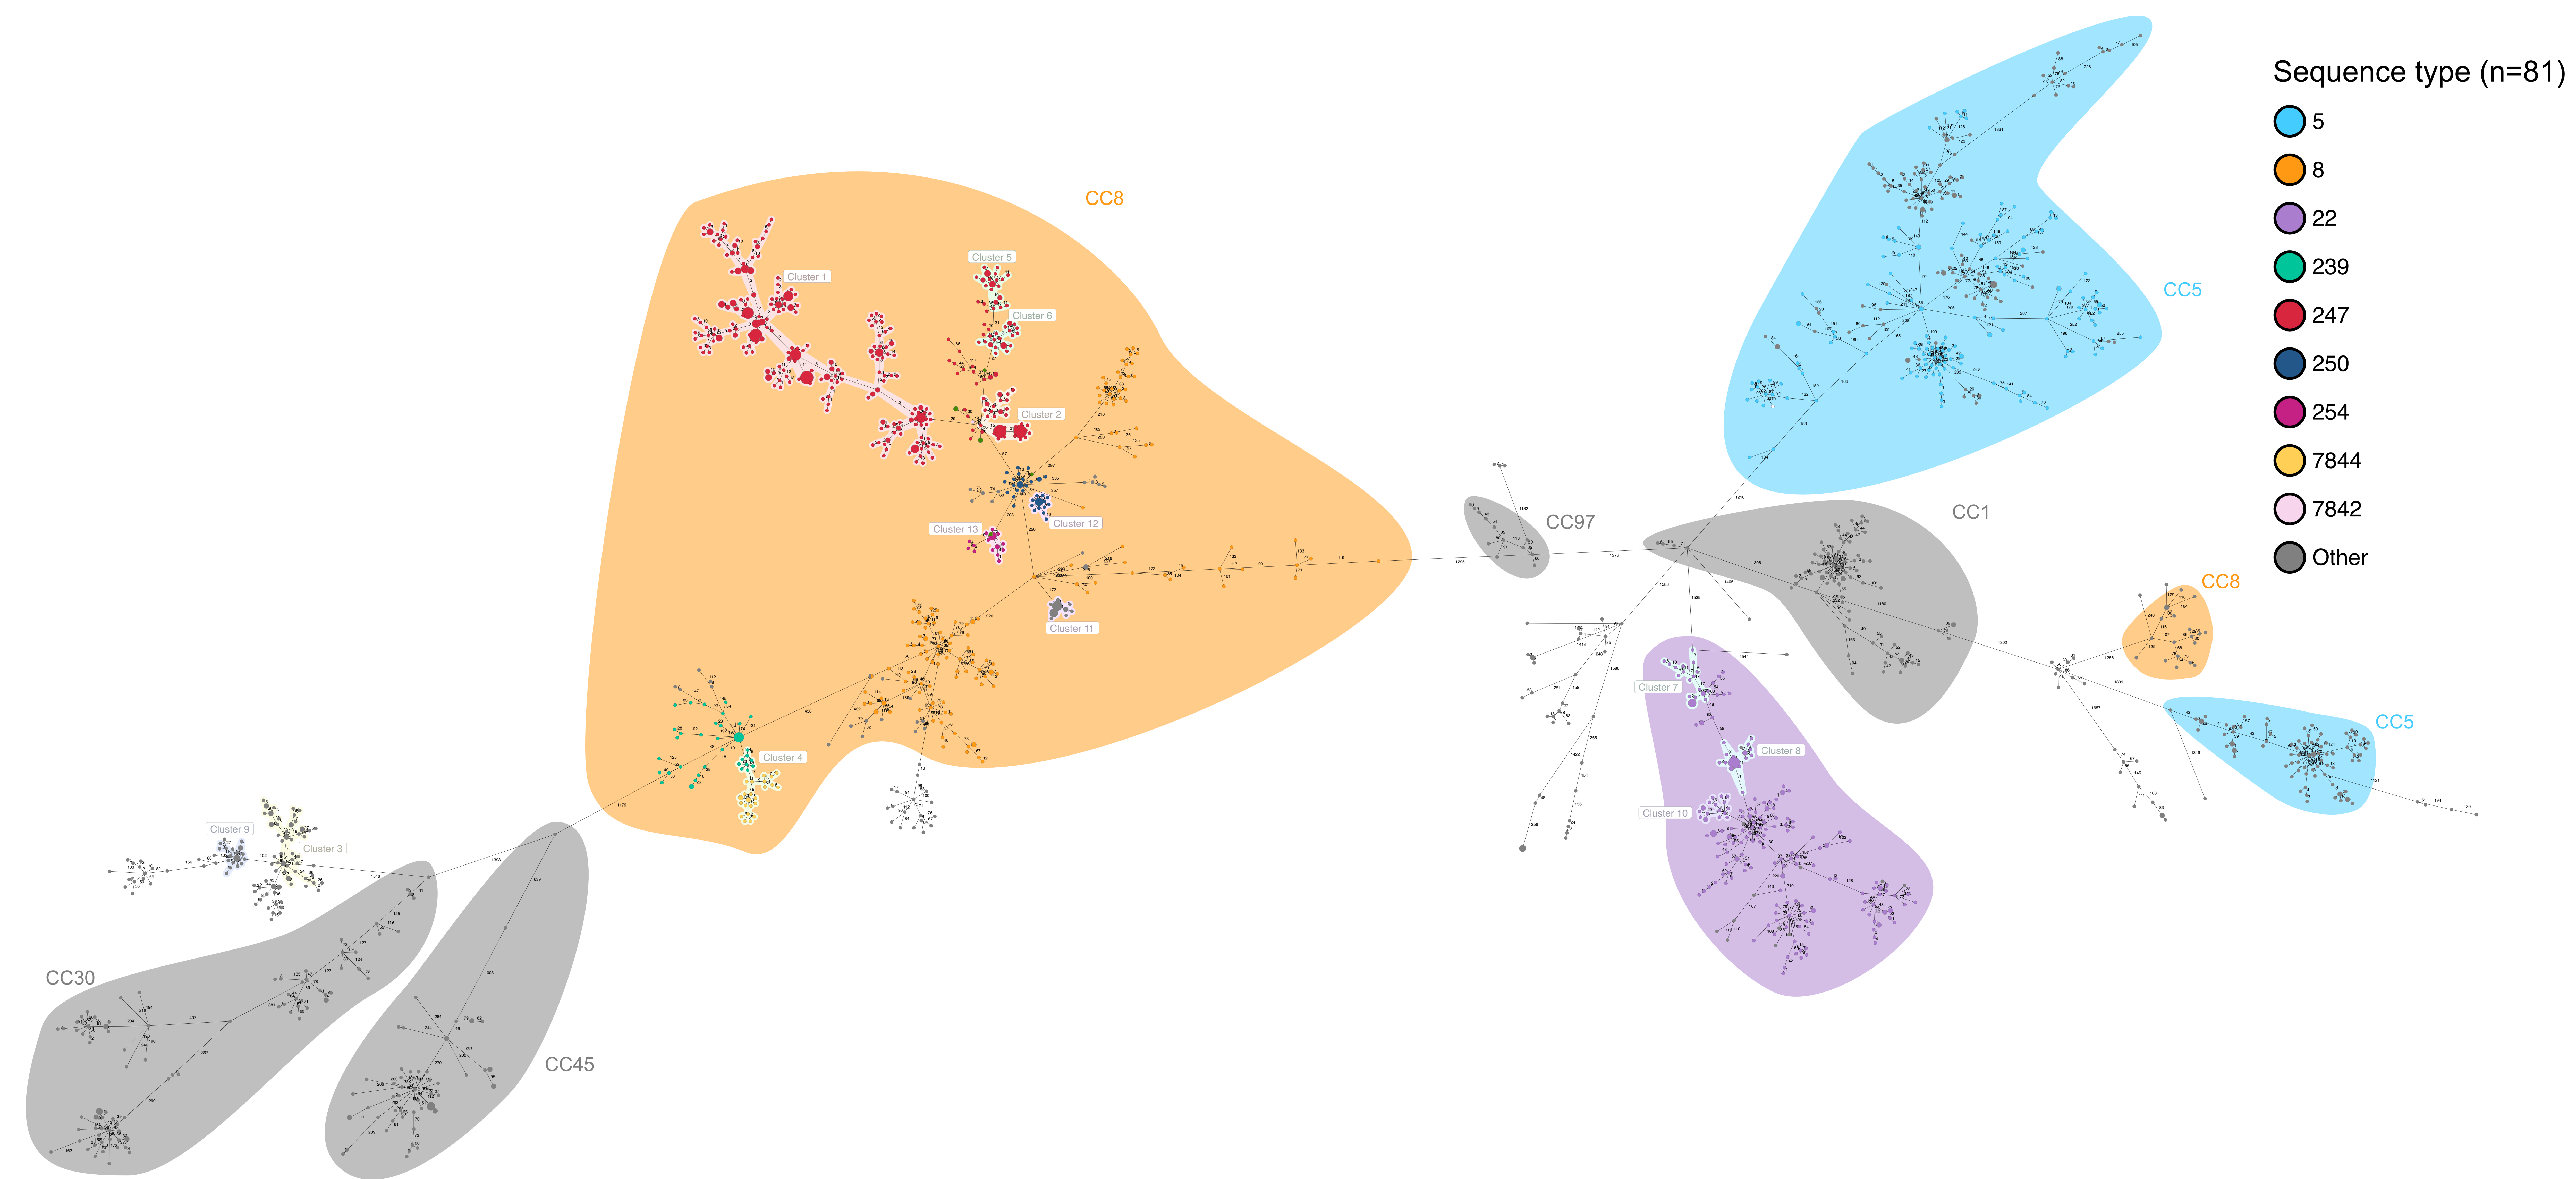

E. cgMLST MST of CCoS, public repository and University Hospital of Basel genomes of MRSA (1960-2022, n = 1761), nodes colored by collection country. Clusters are shown with a maximal cluster distance of 24 allele differences and a minimal cluster size of 15. Clonal complexes are shaded in.

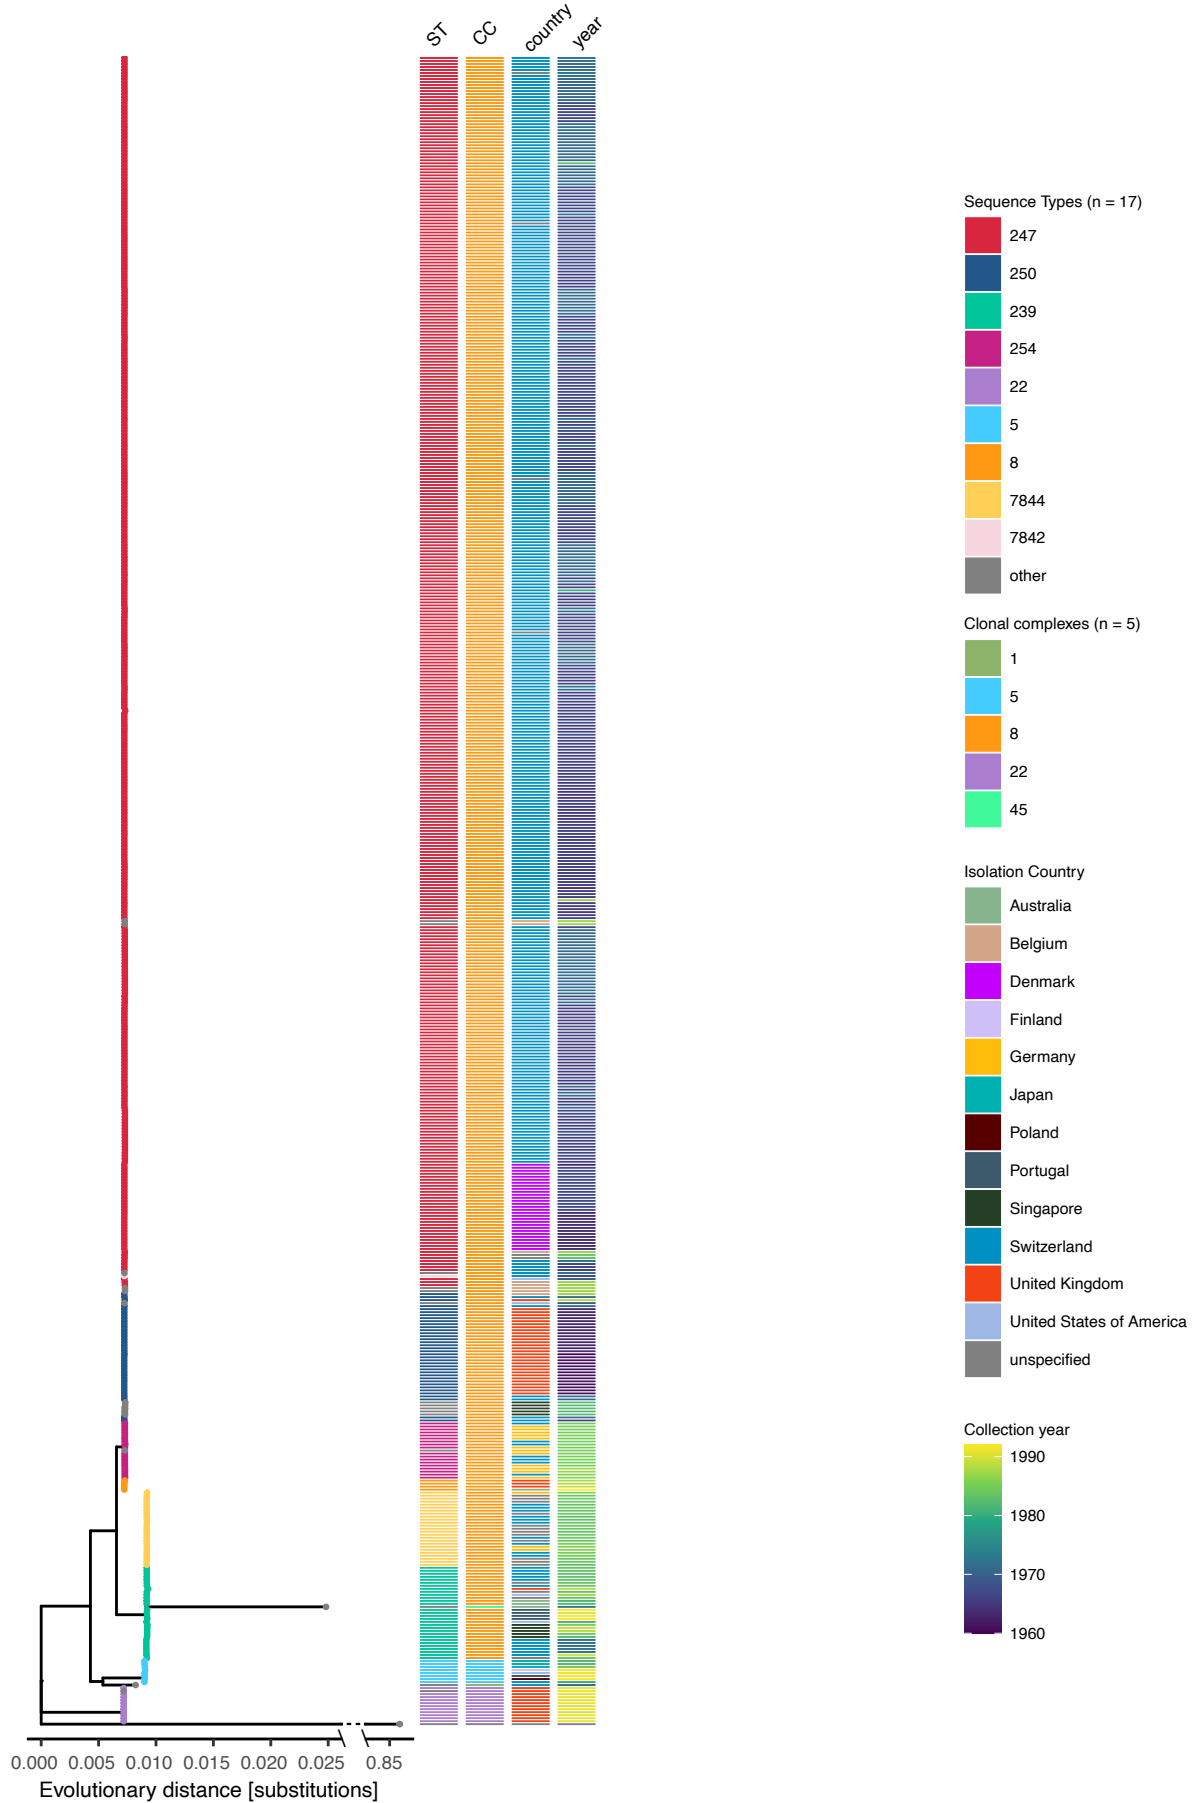

F. MLST sequence type, clonal complex, collection country and collection year mapped to a maximum likelihood core genome SNP tree of ancient Swiss and international MRSA (1960 -1992, n = 554). Leaves colored by sequence type. Outgroup (*S. epidermis*) line shortened through X-axis break for visualization purposes.

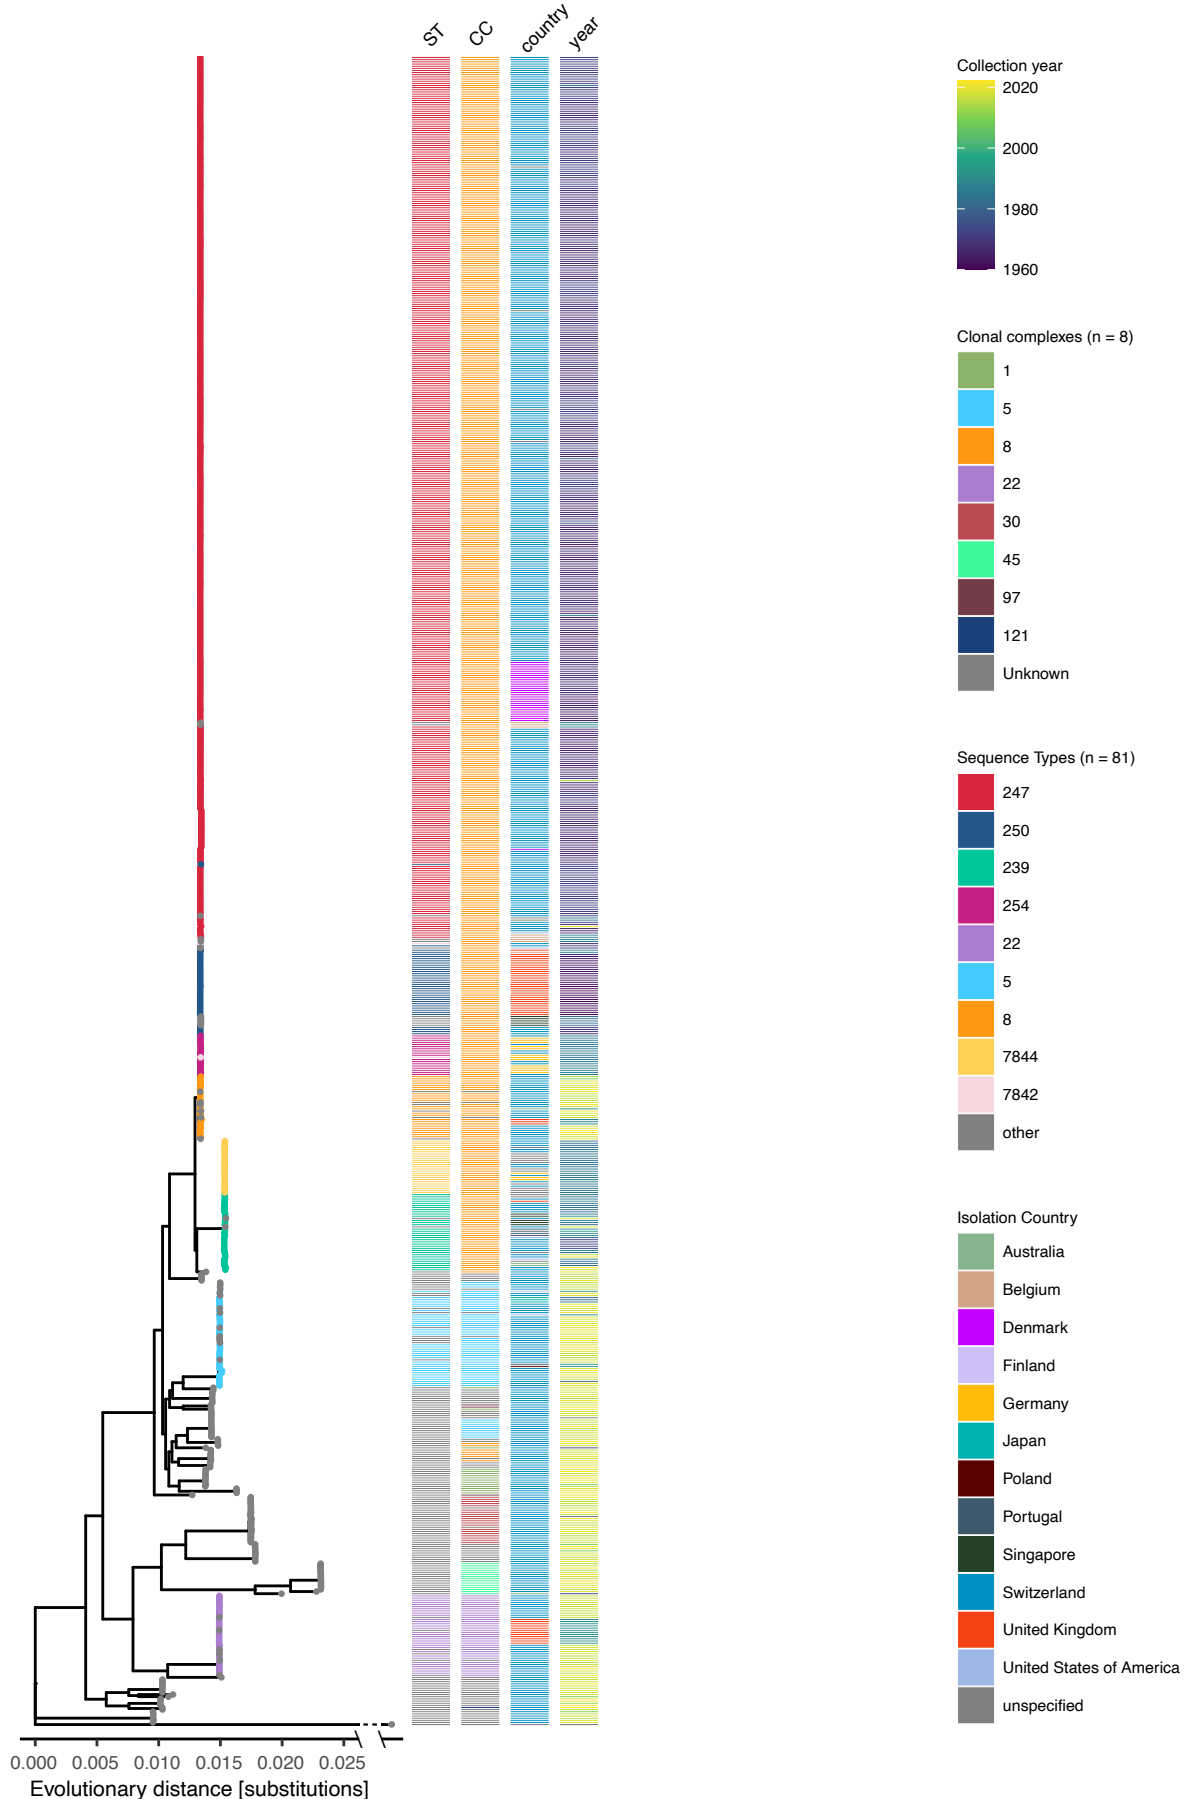

G. MLST sequence type, clonal complex, collection country and collection year mapped to a maximum likelihood core genome SNP tree of MRSA from the CCoS, public repositories and dereplicated modern Swiss isolates (1960 -2022, n = 777). Leaves colored by sequence type. Outgroup (*S. epidermis*) line shortened through X-axis break for visualization purposes.

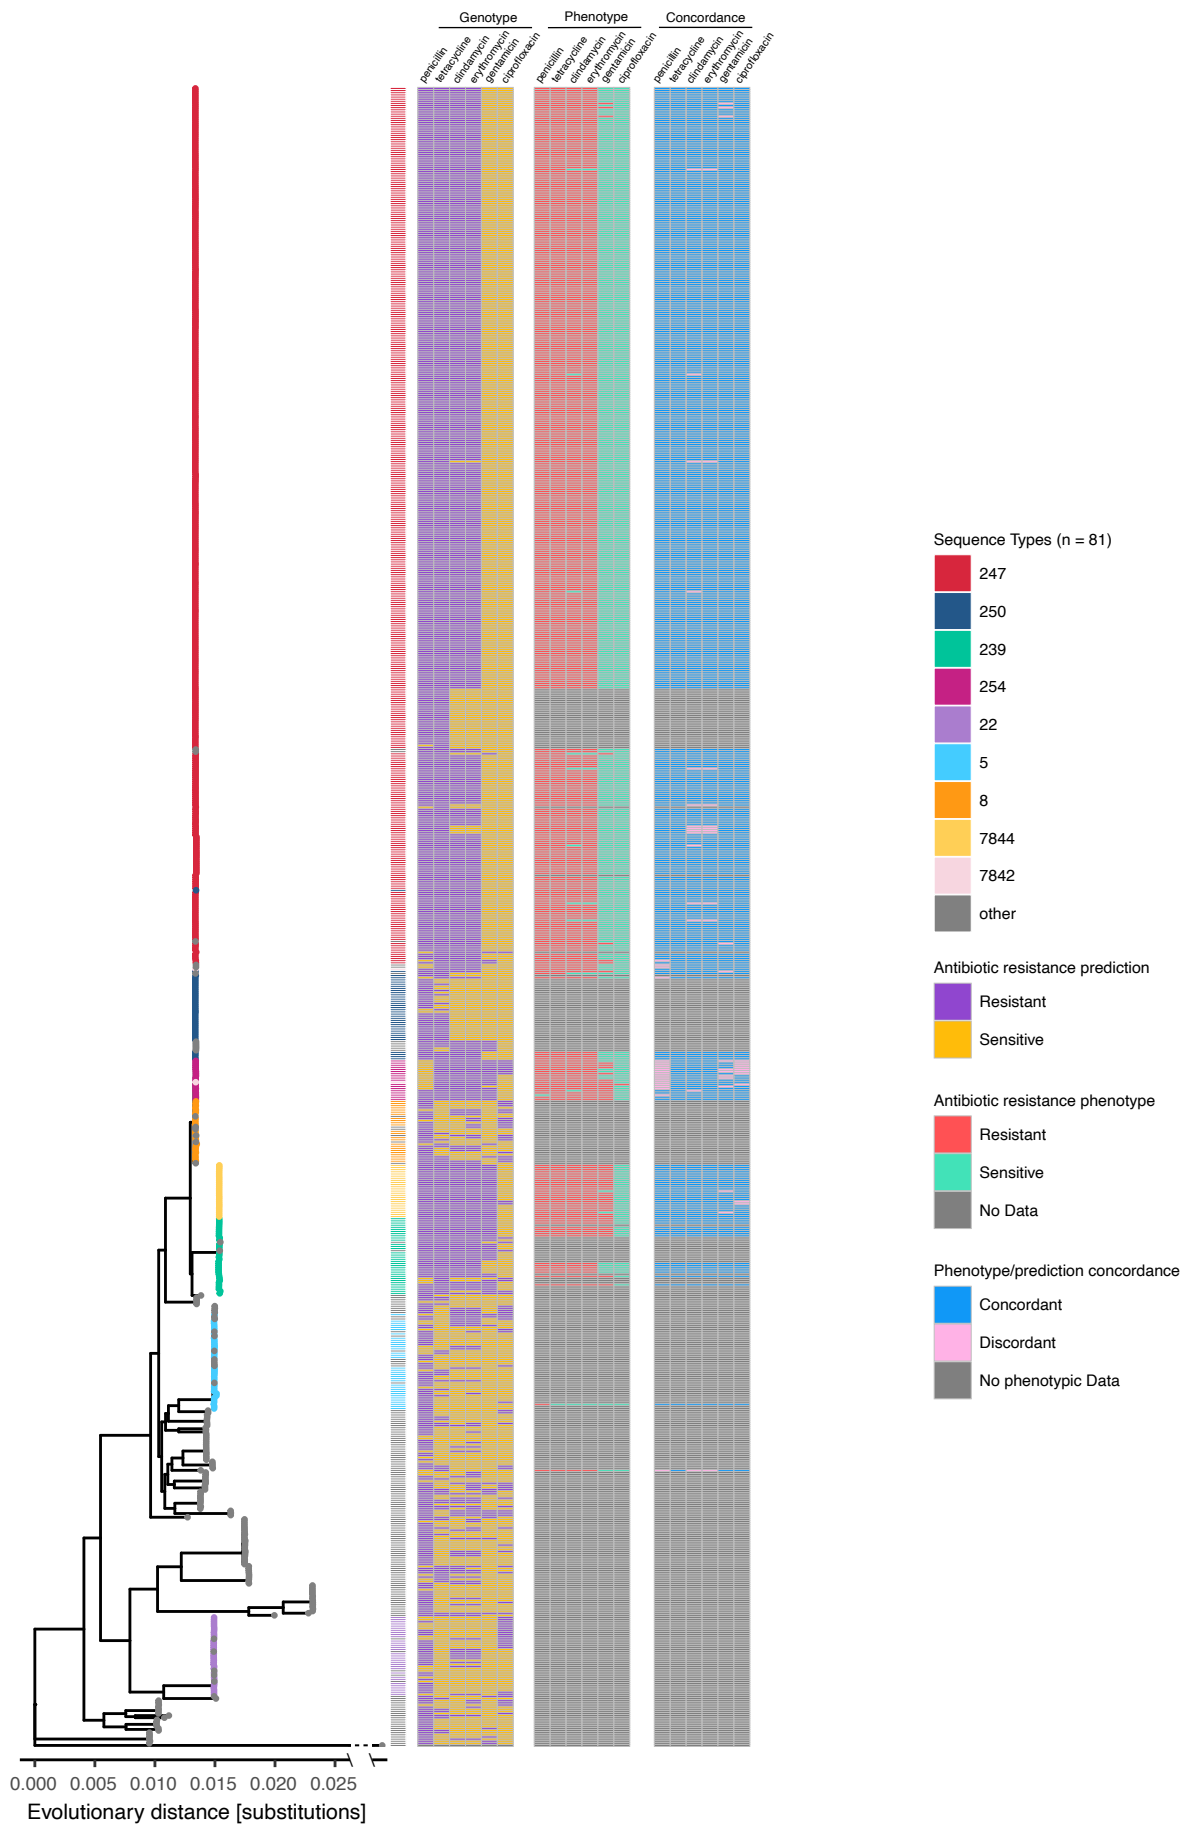

H. Predicted resistance/sensitivity, phenotypical resistance/sensitivity and concordance between the two mapped to a maximum likelihood core genome SNP tree of MRSA from the CCoS, public repositories and dereplicated modern Swiss isolates (1960 -2022, n = 777). Leaves colored by sequence type. Outgroup (*S. epidermis*) line shortened through X-axis break for visualization purposes.



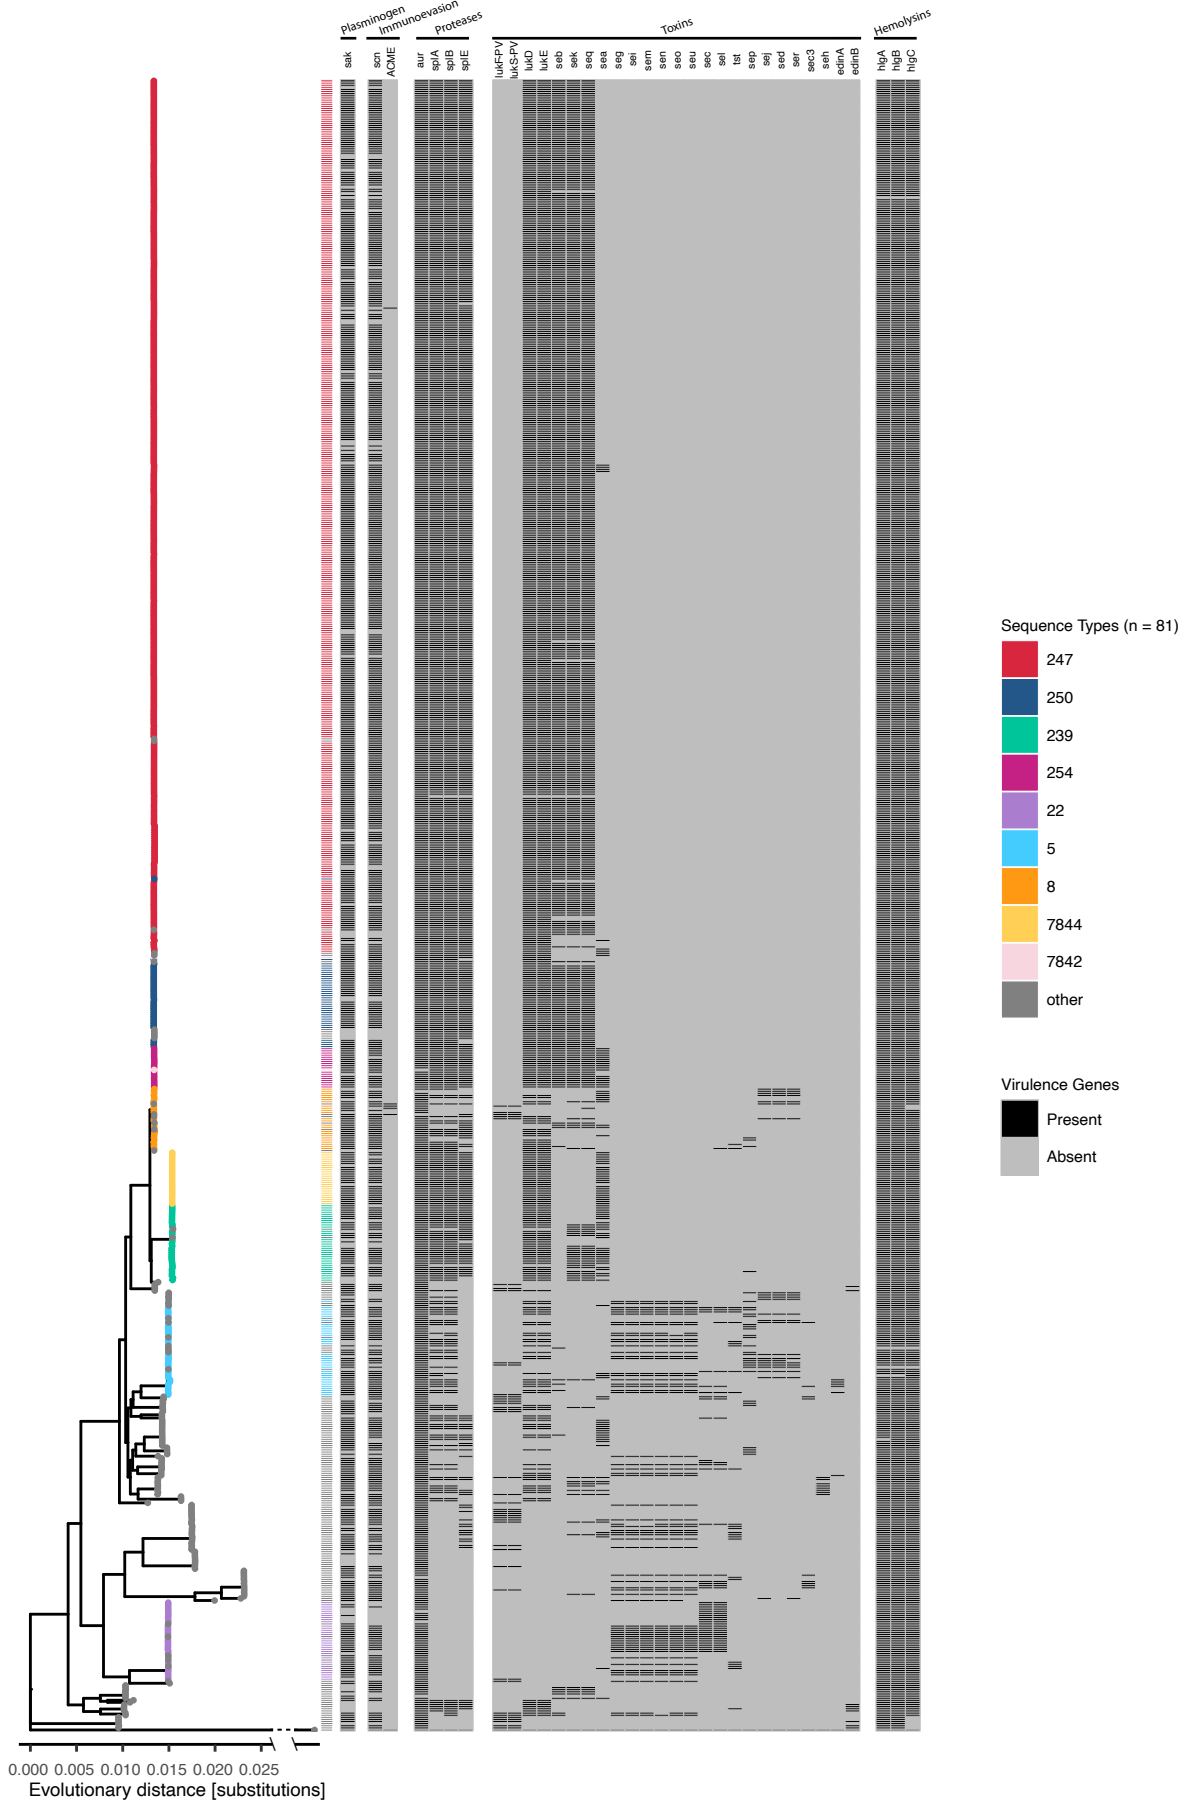

I. Virulence gene presence/absence heatmap mapped to a maximum likelihood core genome SNP tree of MRSA from the CCoS, public repositories and dereplicated modern Swiss isolates (1960 -2022, n = 777). Leaves colored by sequence type. Outgroup (*S. epidermidis*) line shortened through X-axis break for visualization purposes.

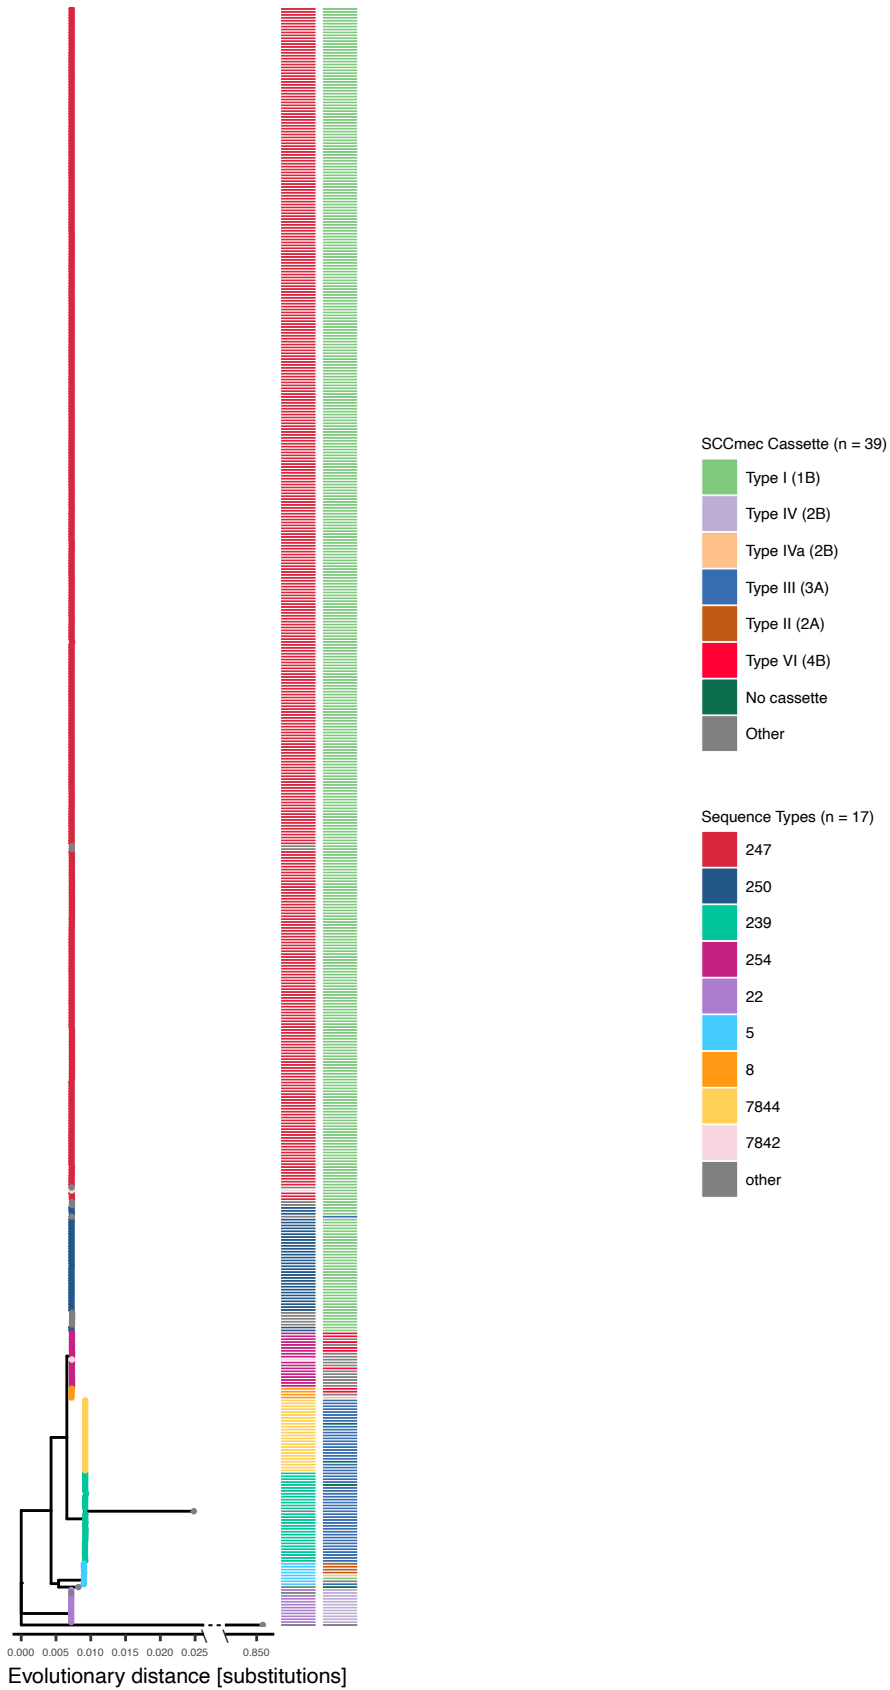

J. SCCmec type mapped to a maximum likelihood core genome SNP tree of ancient Swiss and international MRSA (1960 -1992, n = 554). Leaves colored by sequence type. Outgroup (*S. epidermis*) line shortened through X-axis break for visualization purposes.

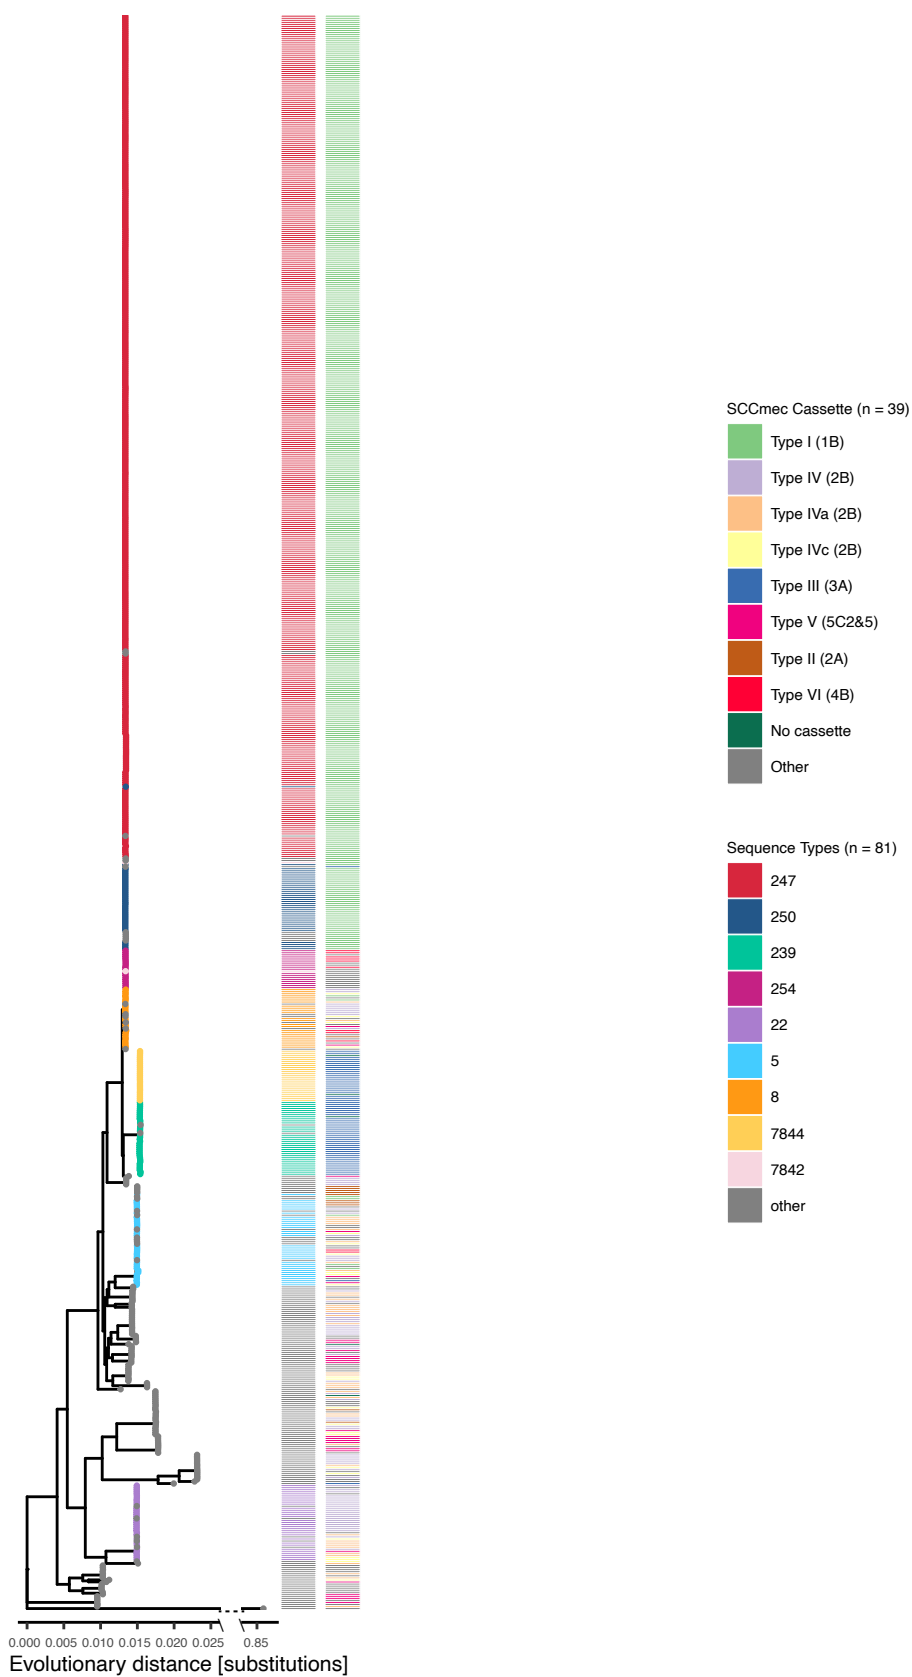

K. SCCmec type mapped to a maximum likelihood core genome SNP tree of MRSA from the CCoS, public repositories and dereplicated modern Swiss isolates (1960 -2022, n = 777). Leaves colored by sequence type. Outgroup (*S. epidermidis*) line shortened through X-axis break for visualization purposes.

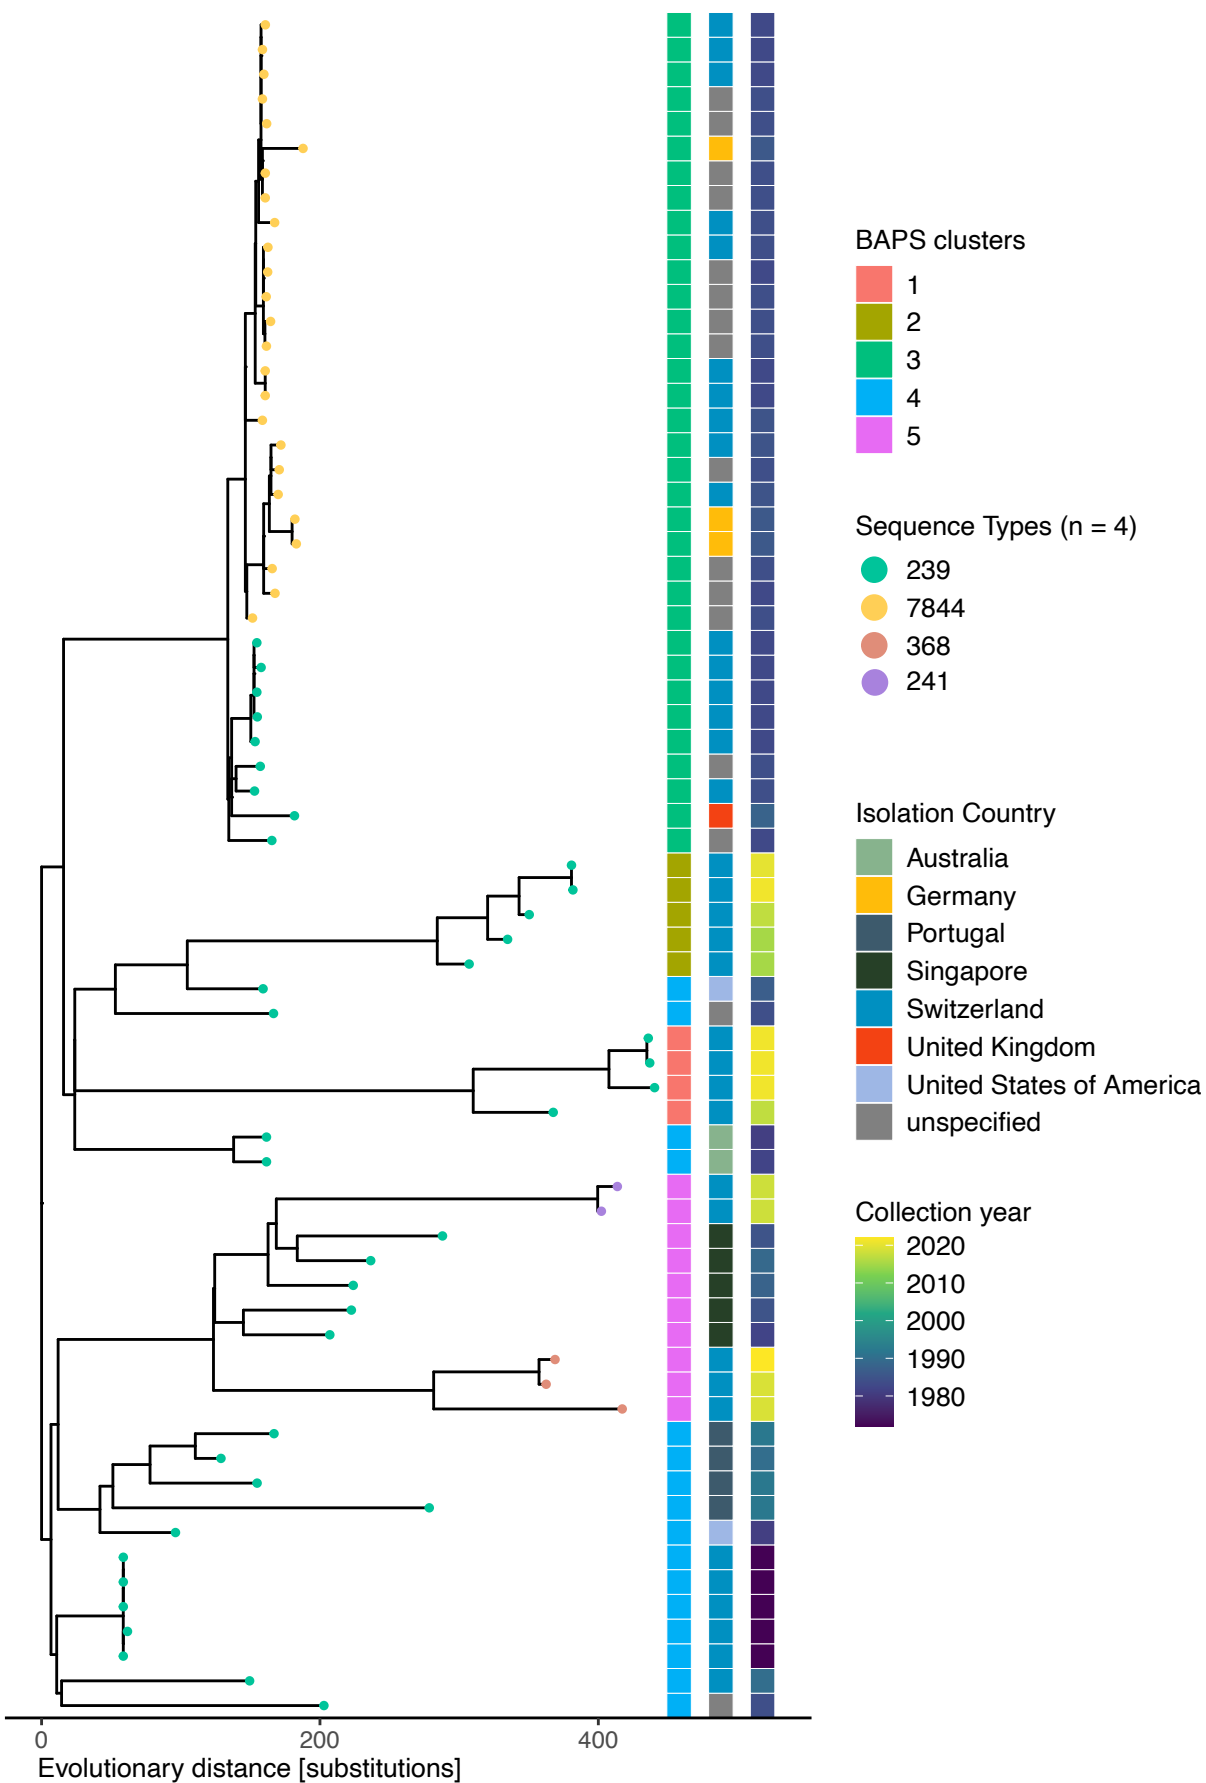

L. BAPS clusters, collection country and collection year mapped to a maximum likelihood whole genome SNP tree of ST239, ST7844, ST368 and ST241 MRSA (n = 69). Leaves colored by sequence type.

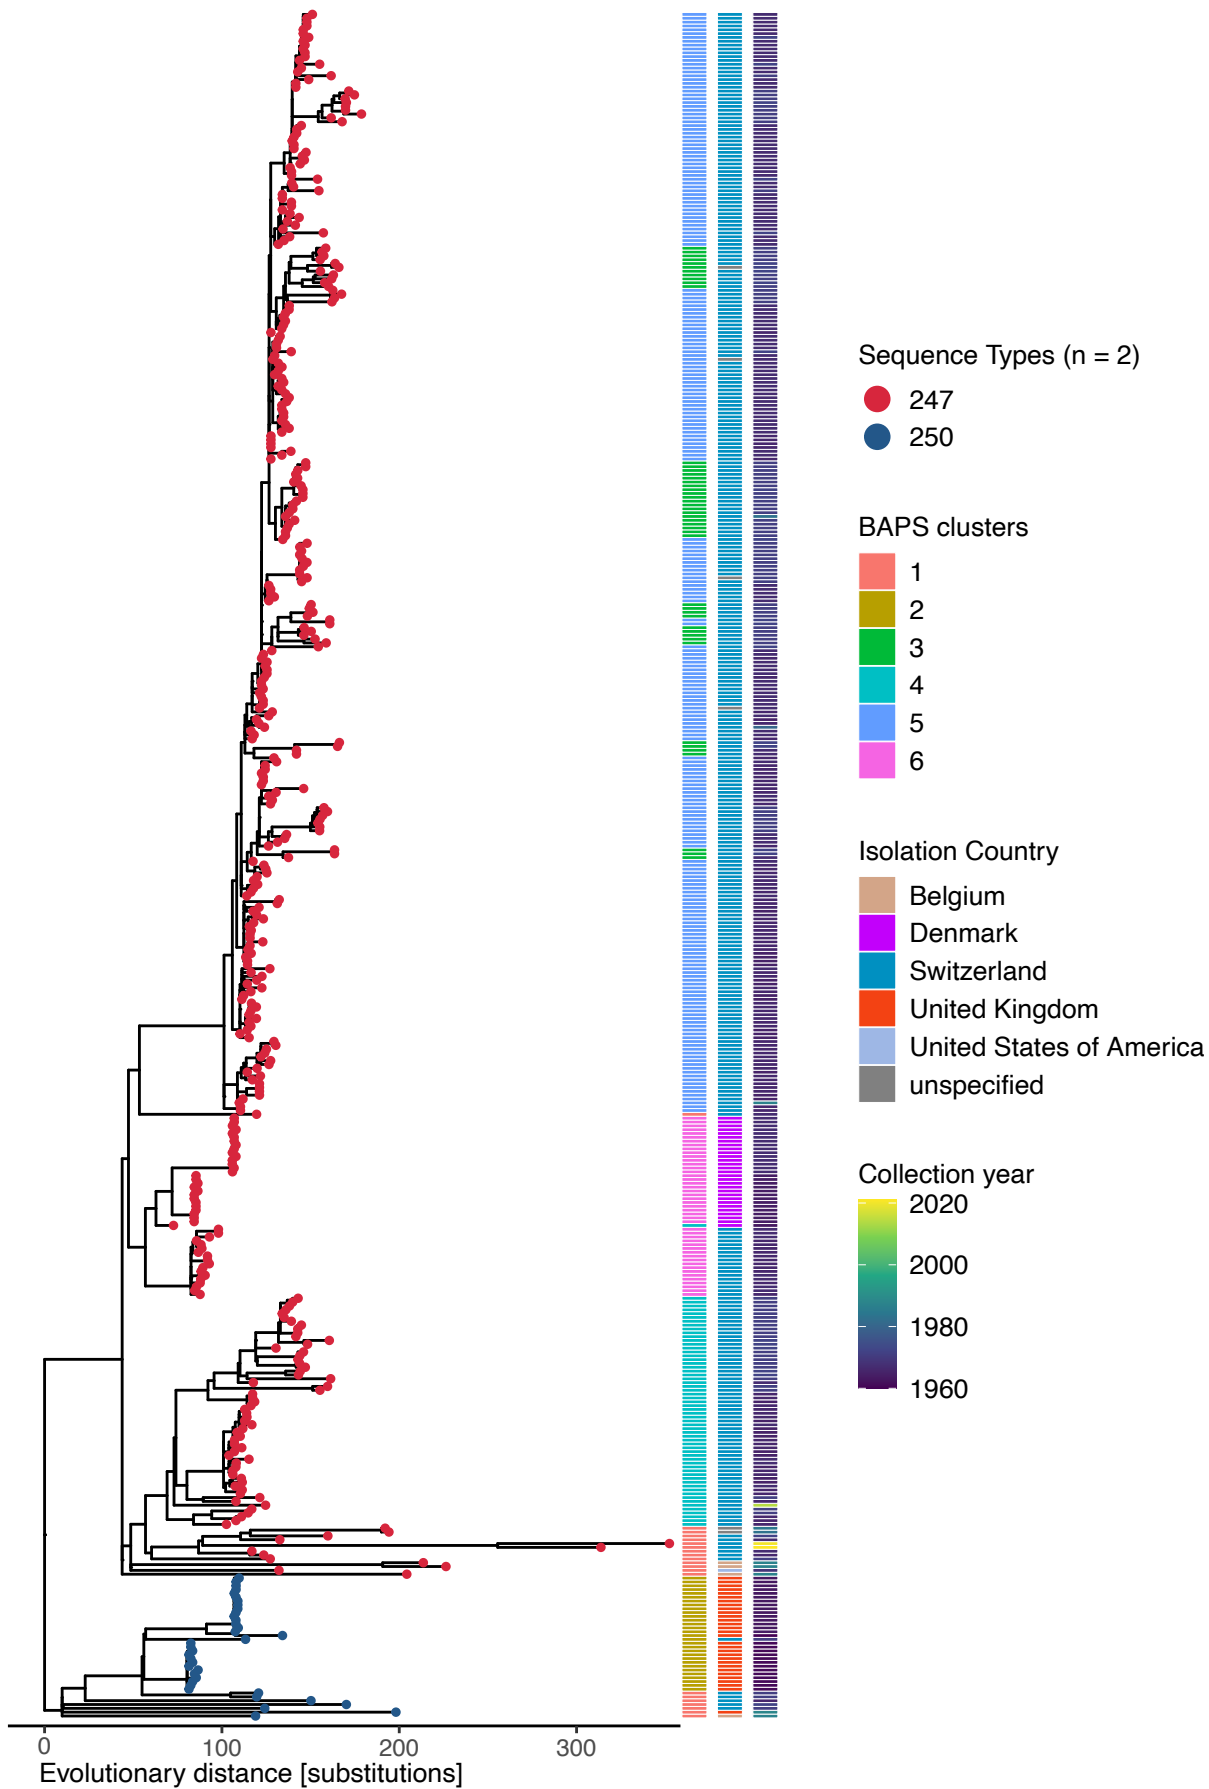

M. BAPS clusters, collection country and collection year mapped to a maximum likelihood whole genome SNP tree of ST247 and ST250 MRSA (n = 445). Leaves colored by sequence type

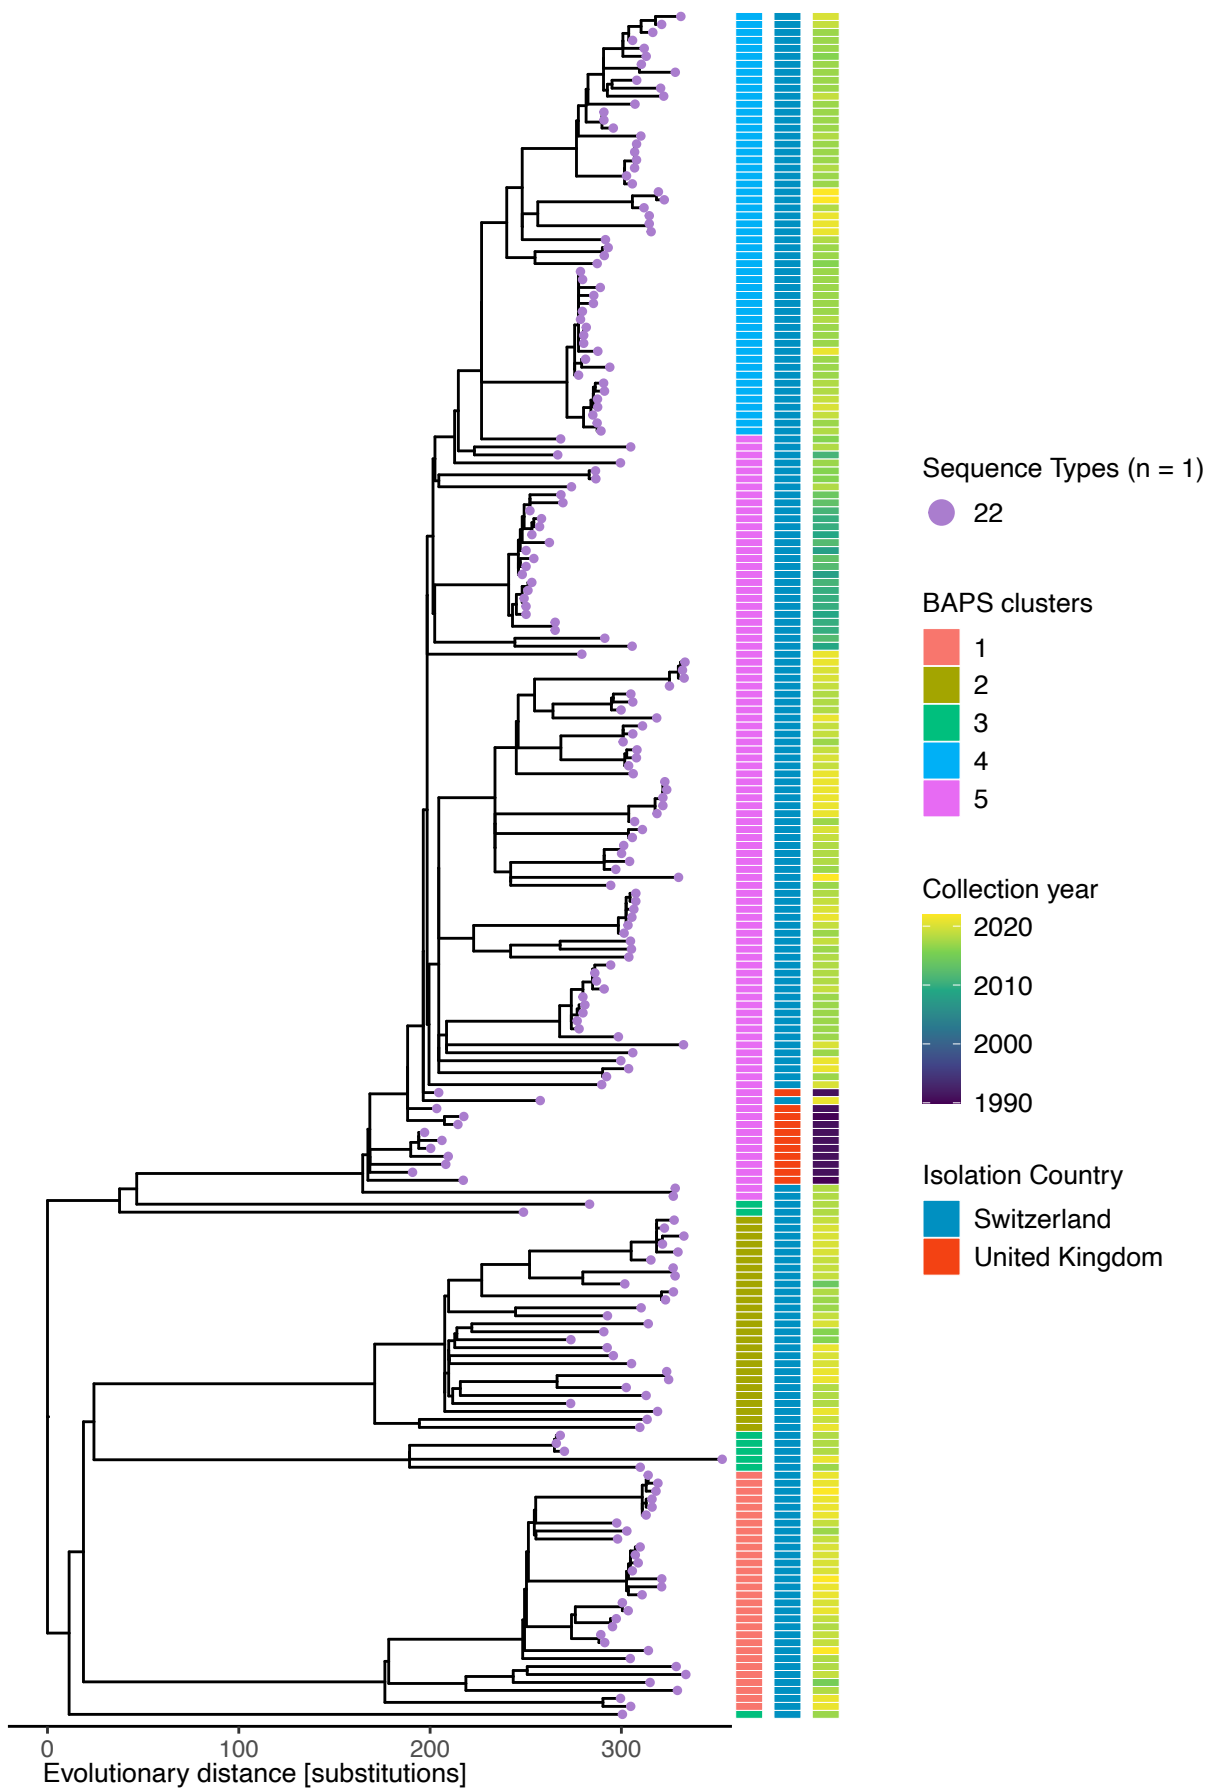

N. BAPS clusters, collection country and collection year mapped to a maximum likelihood whole genome SNP tree of ST22 MRSA (n = 214). Leaves colored by sequence type.
