# Supplementary material for: Historic methicillin-resistant Staphylococcus aureus: expanding current knowledge using molecular epidemiological characterization of a Swiss legacy collection
Source: Genome Med. 2024 Feb 5;16:23. doi: 10.1186/s13073-024-01292-w (PMC10840241; doi:10.1186/s13073-024-01292-w)
Supplement: Supplementary file 3 — Additional file 3. A table detailing the discrepancies between AMR predictions conducted with assemblies and predictions done with reads. [file 13073_2024_1292_MOESM3_ESM.csv]

Antibiotic	Number of discrepancies	Discrepancies corrected, by analysing reads	Resistance genes found below coverage threshold
penicillin	20	CCOS-1330, CCOS-1658	0
clindamycin	15	0	CCOS-1630, CCOS-1658
erythromycin	11	0	CCOS-1630, CCOS-1658
gentamycin	14	CCOS-1844, CCOS-1855	0
ciprofloxacin	10	0	0
